# Supplementary material for: The DBD-α4 helix of EWSR1::FLI1 is required for GGAA microsatellite binding that underlies genome regulation in Ewing sarcoma
Source: eLife journal article supplement (doi:10.7554/elife.95626), 2024-03-20
Supplement: fig1-figsupp1-data1 [file A673_FLI_FLAG_tubulin_rep_1_2_3_uncropped.pdf › Labeled images/A673_FLI_FLAG_tubulin_rep_1_2_3_uncropped.pdf]

A673 Rep 1

FLI

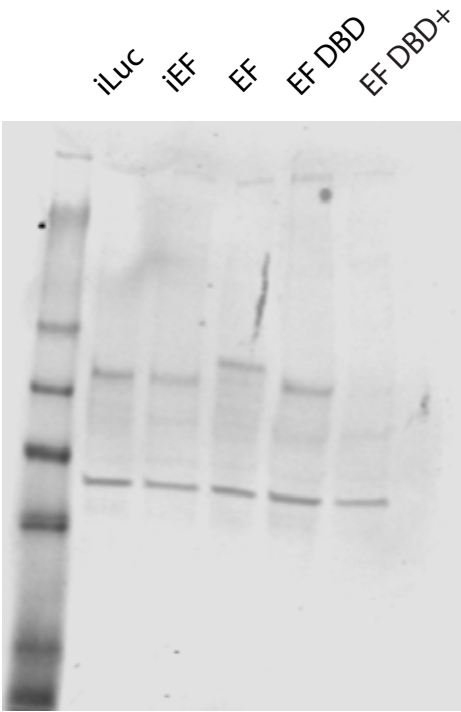

iLuc iEF EF EF DBD EF DBD+

FLAG

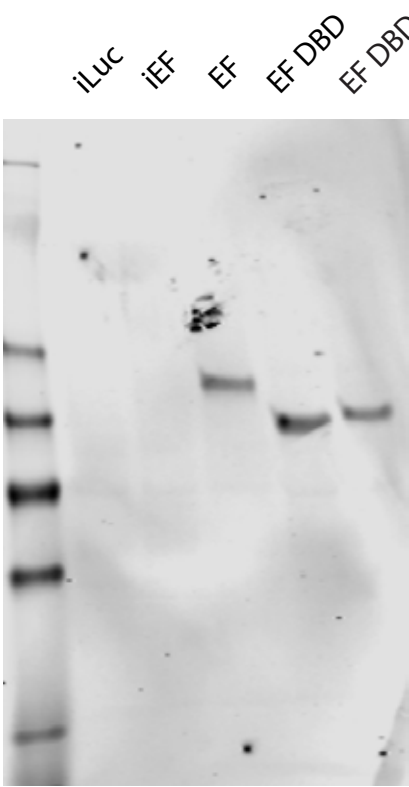

iLuc iEF EF EF DBD EF DBD+

Tubulin

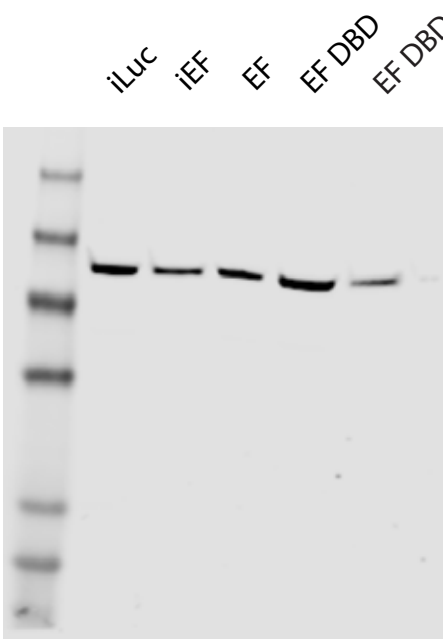

A673 Rep 2

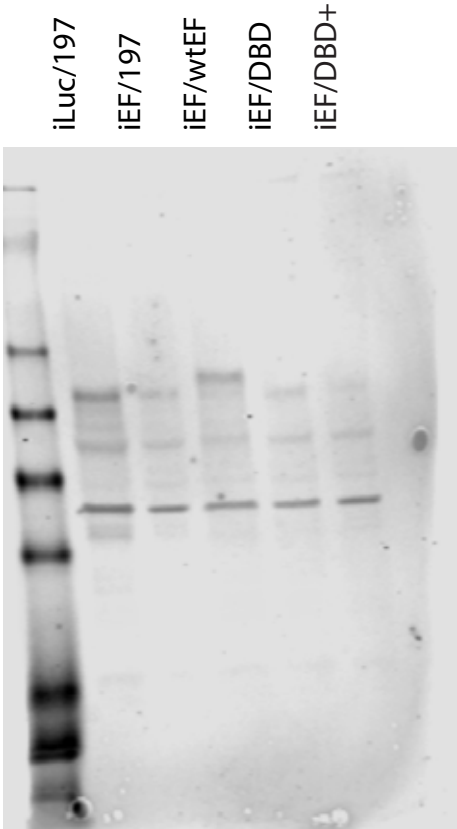

iLuc/197 iEF/197 iEF/wtEF iEF/DBD iEF/DBD+

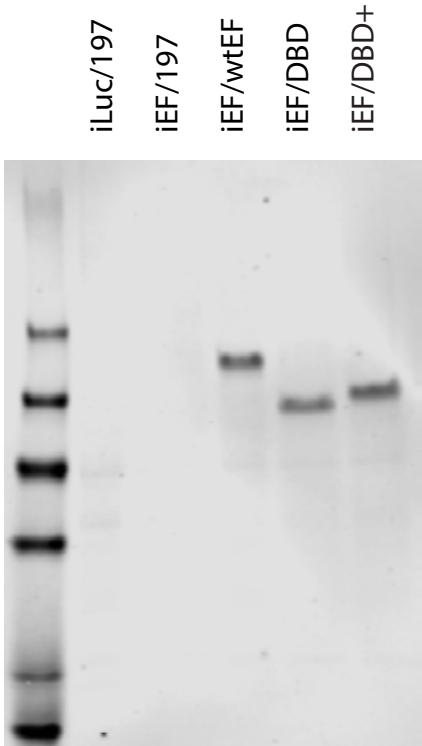

iLuc/197 iEF/197 iEF/wtEF iEF/DBD iEF/DBD+

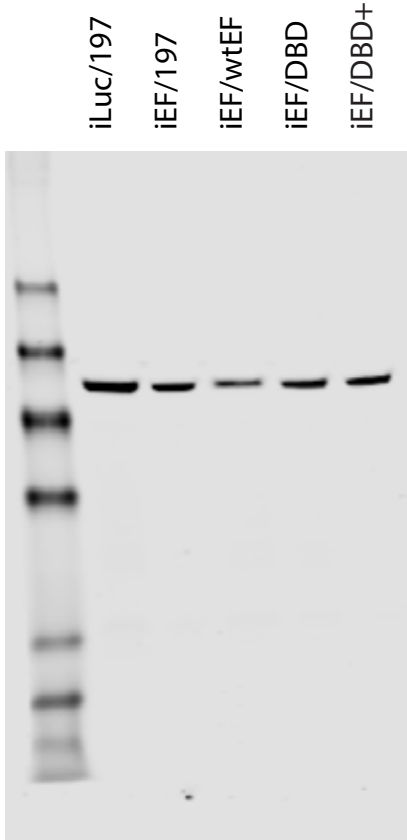

iLuc/197 iEF/197 iEF/wtEF iEF/DBD iEF/DBD+

A673 Rep 3

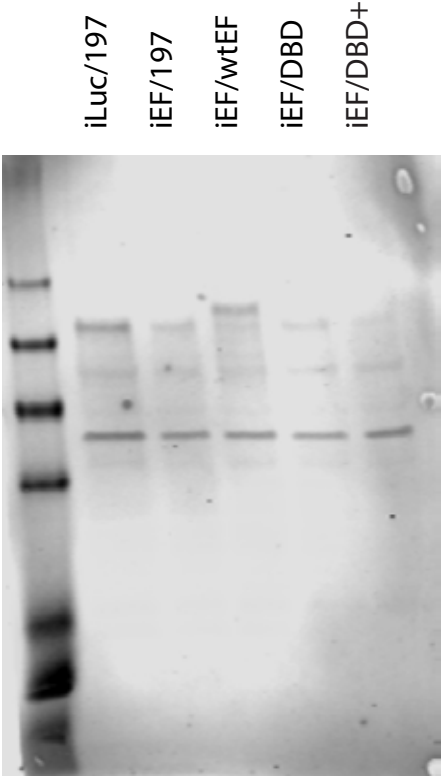

iLuc/197 iEF/197 iEF/wtEF iEF/DBD iEF/DBD+

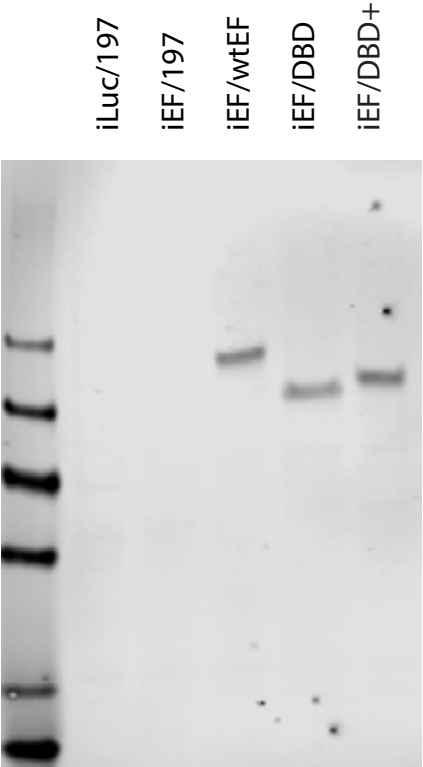

iLuc/197 iEF/197 iEF/wtEF iEF/DBD iEF/DBD+

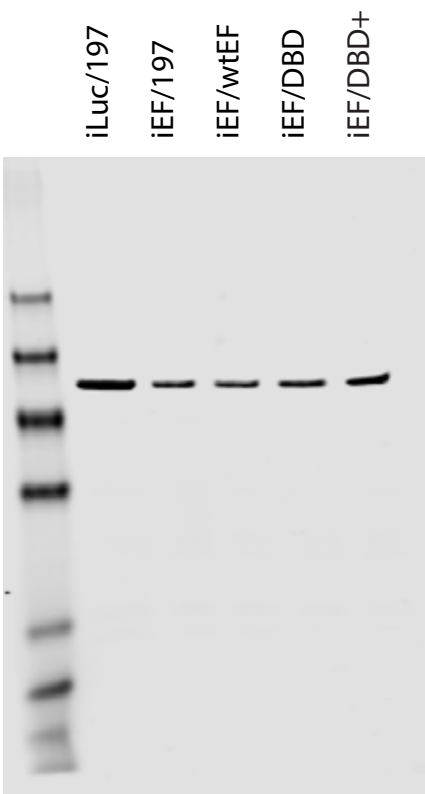

iLuc/197 iEF/197 iEF/wtEF iEF/DBD iEF/DBD+
