# Supplementary figures and images for: The DBD-α4 helix of EWSR1::FLI1 is required for GGAA microsatellite binding that underlies genome regulation in Ewing sarcoma
Source: eLife journal article supplement (doi:10.7554/elife.95626), 2024-03-20

iEF

EF

EF DBD

EF DBD+

Tech rep 1

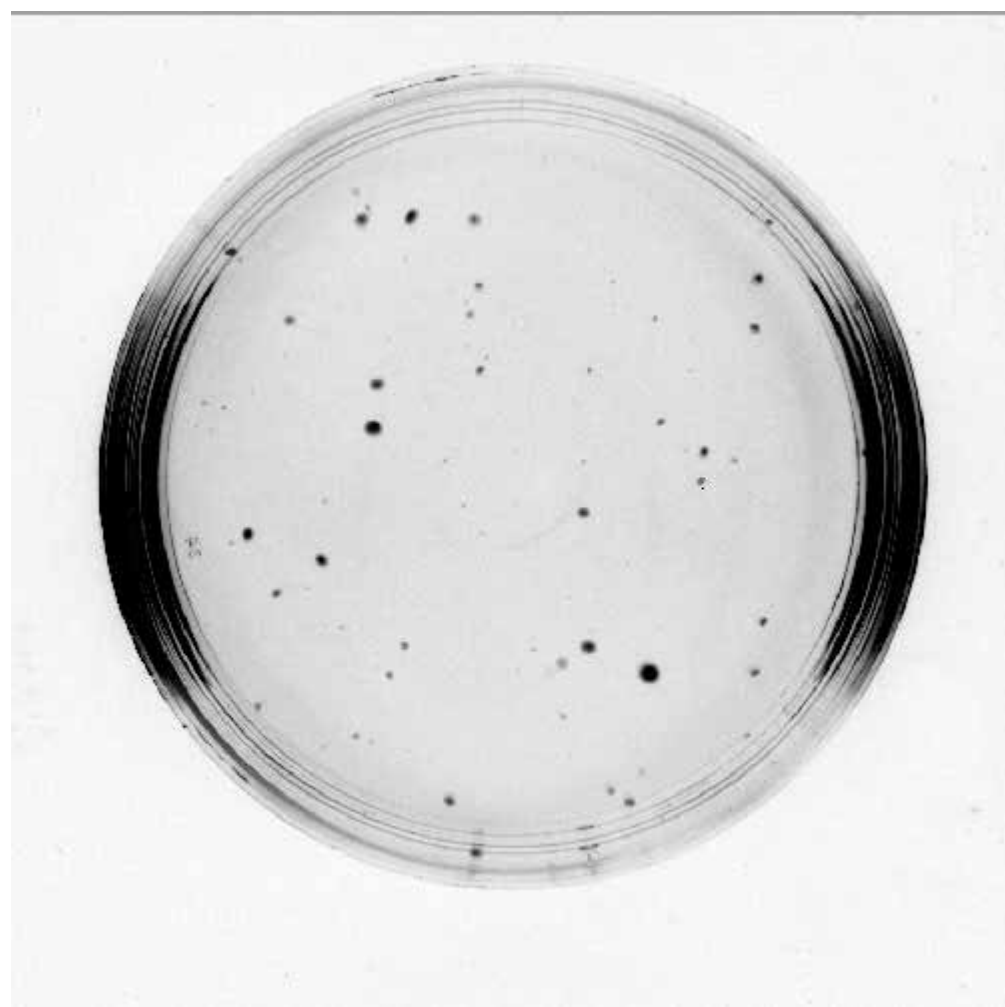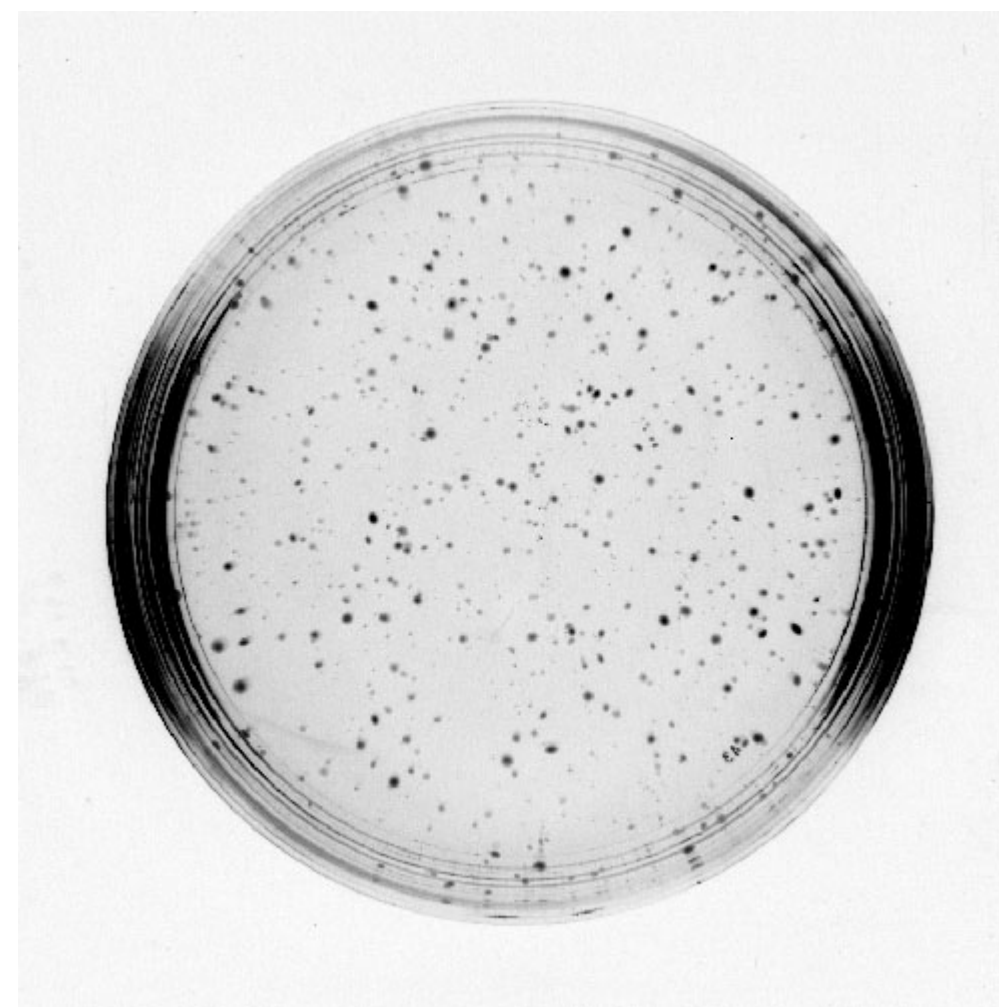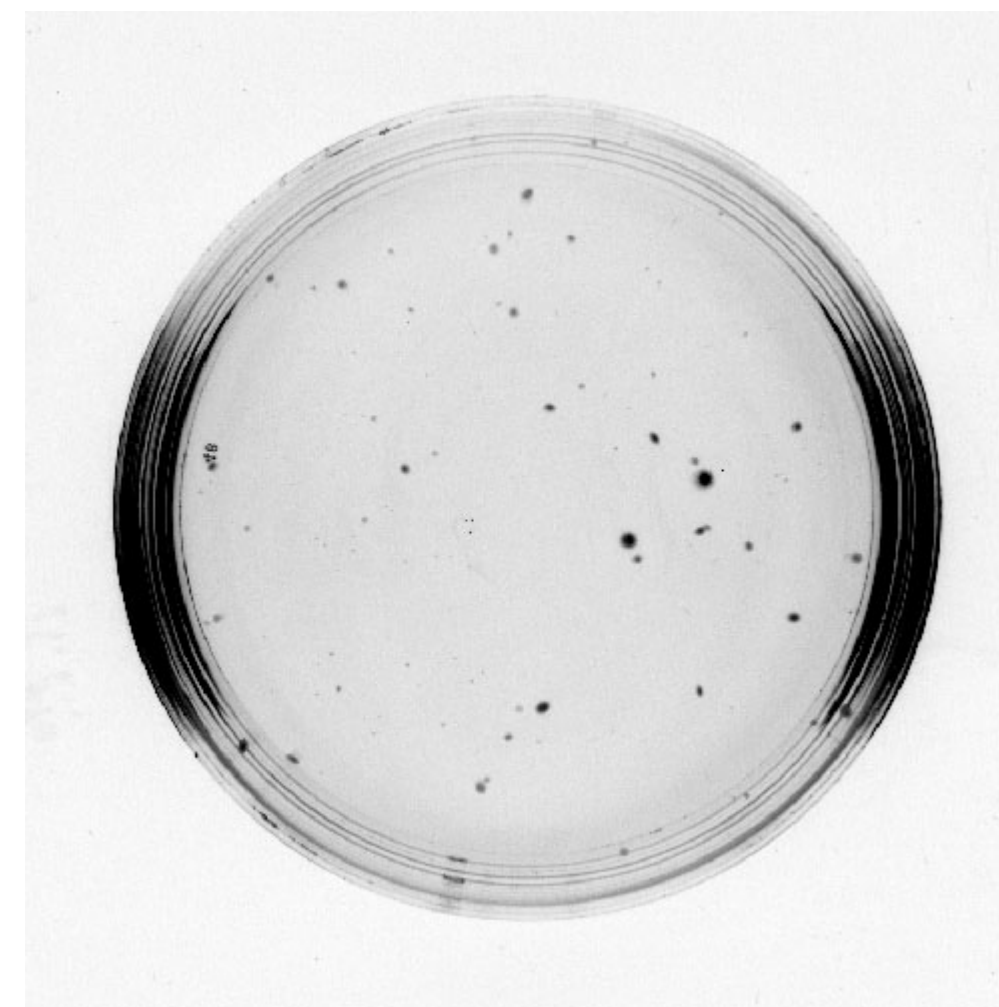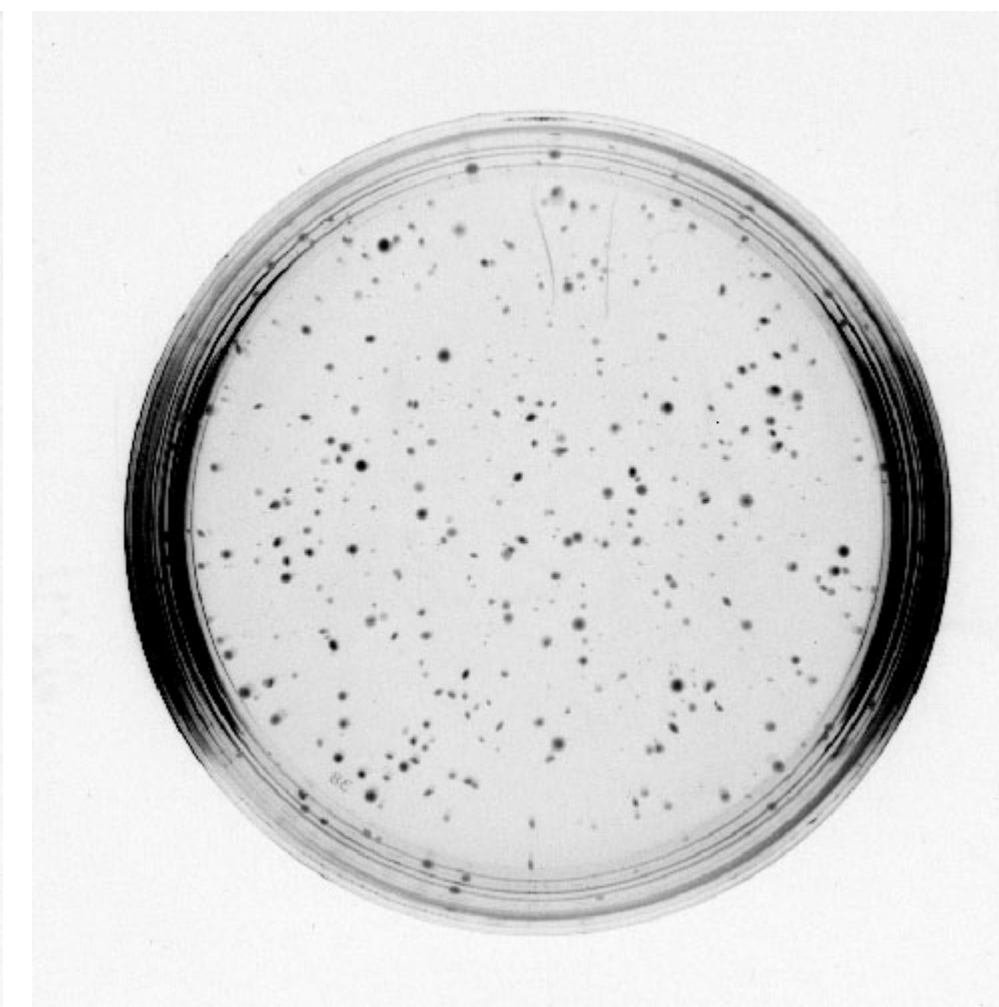

Tech rep 2

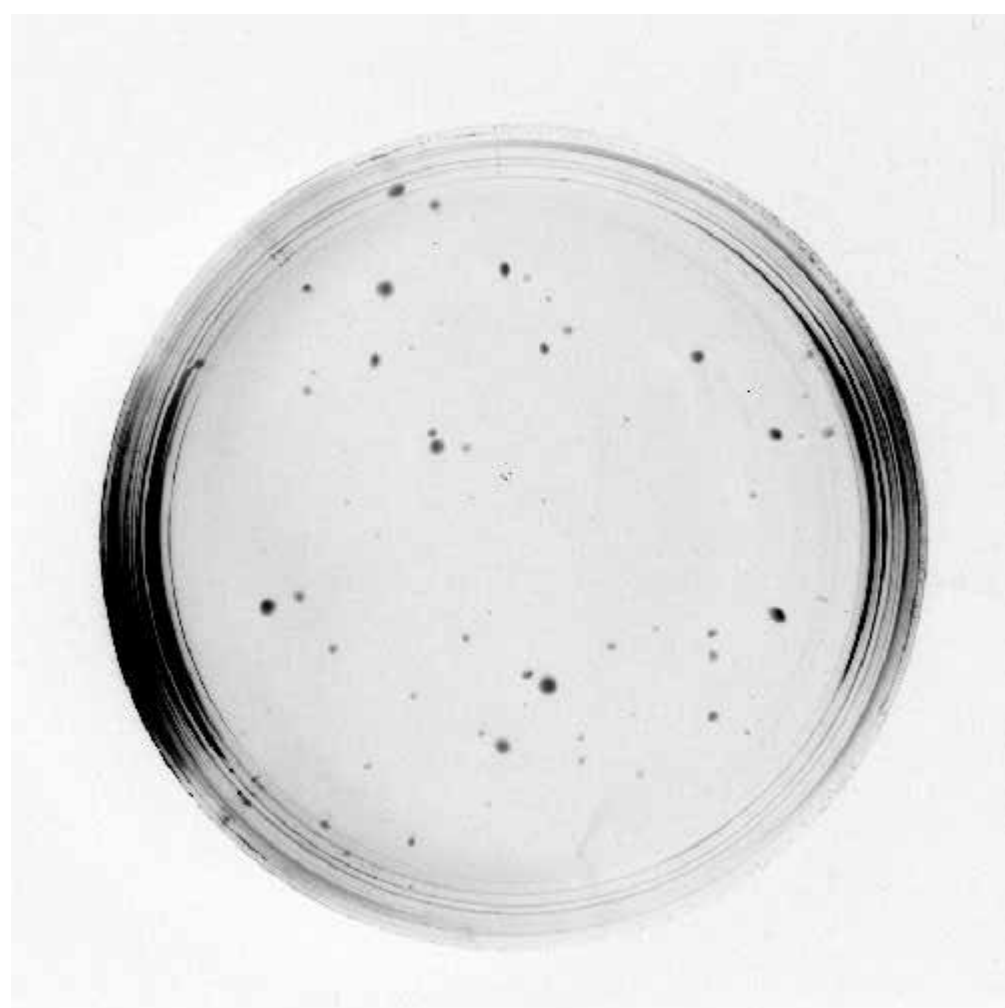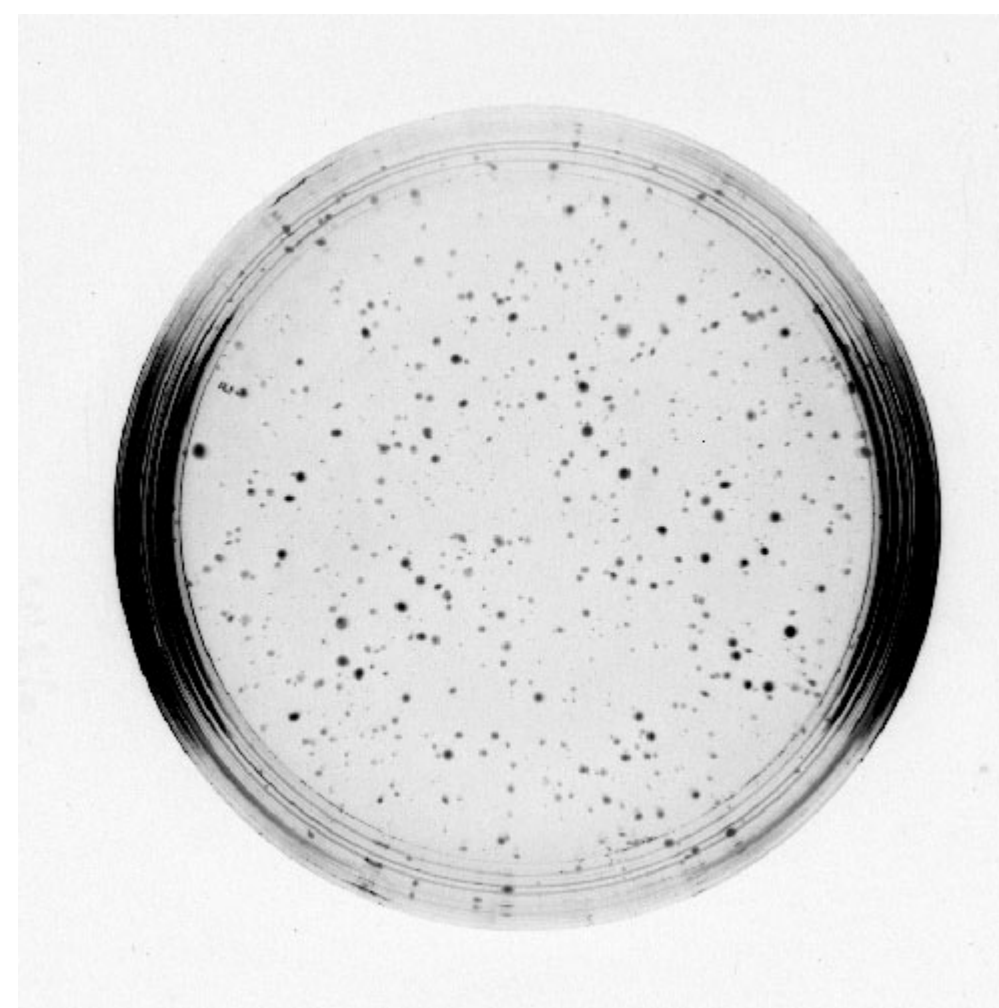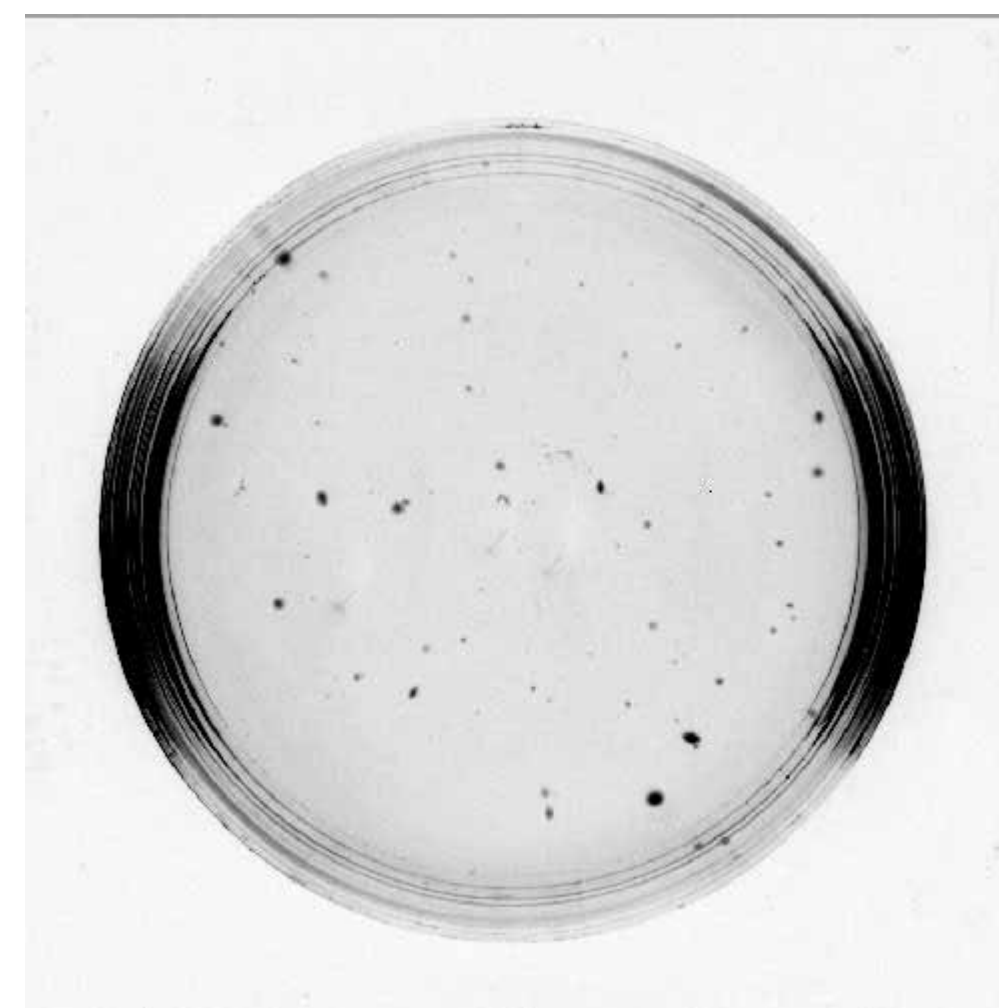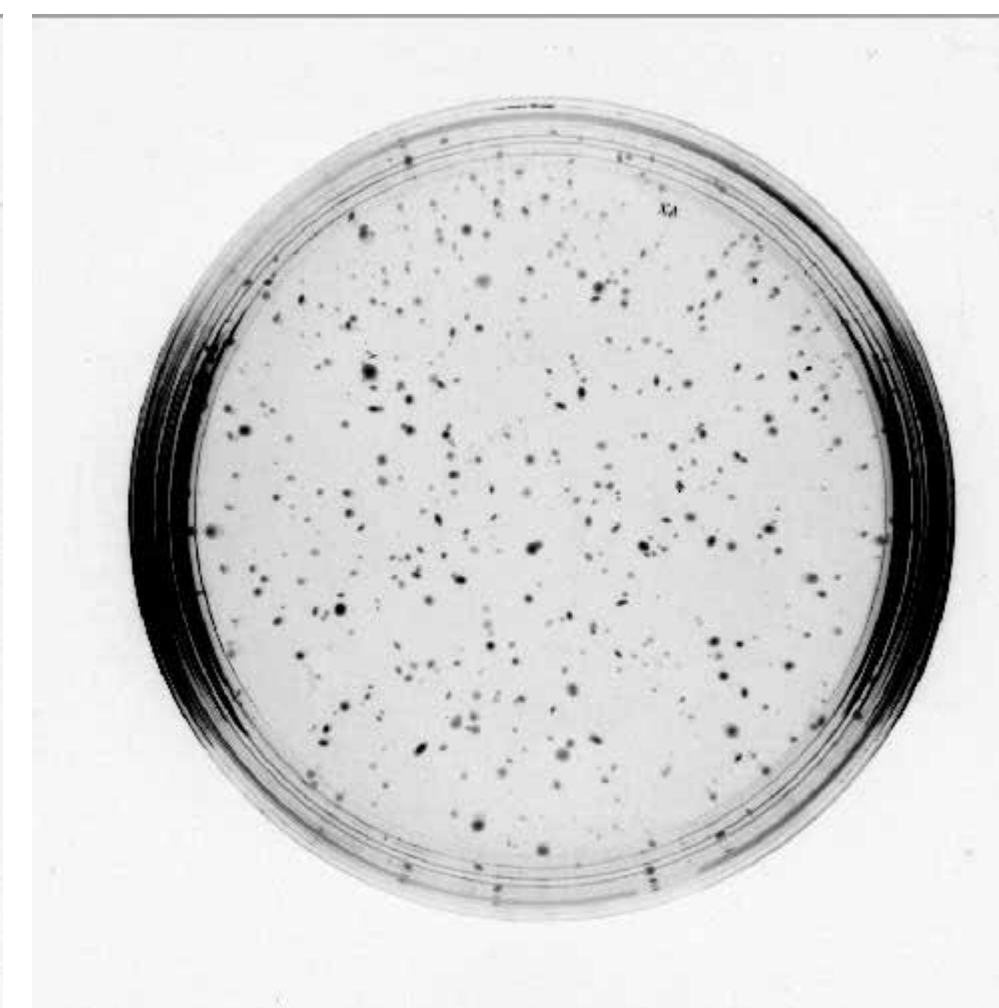

A673 Rep 1

Supplement: fig1-figsupp1-data3 [file R1_submission.pdf › Labelled images/R1_submission.pdf]

iEF/197

iEF/wtEF

iEF/DBD

iEF/DBD+

Tech rep 1

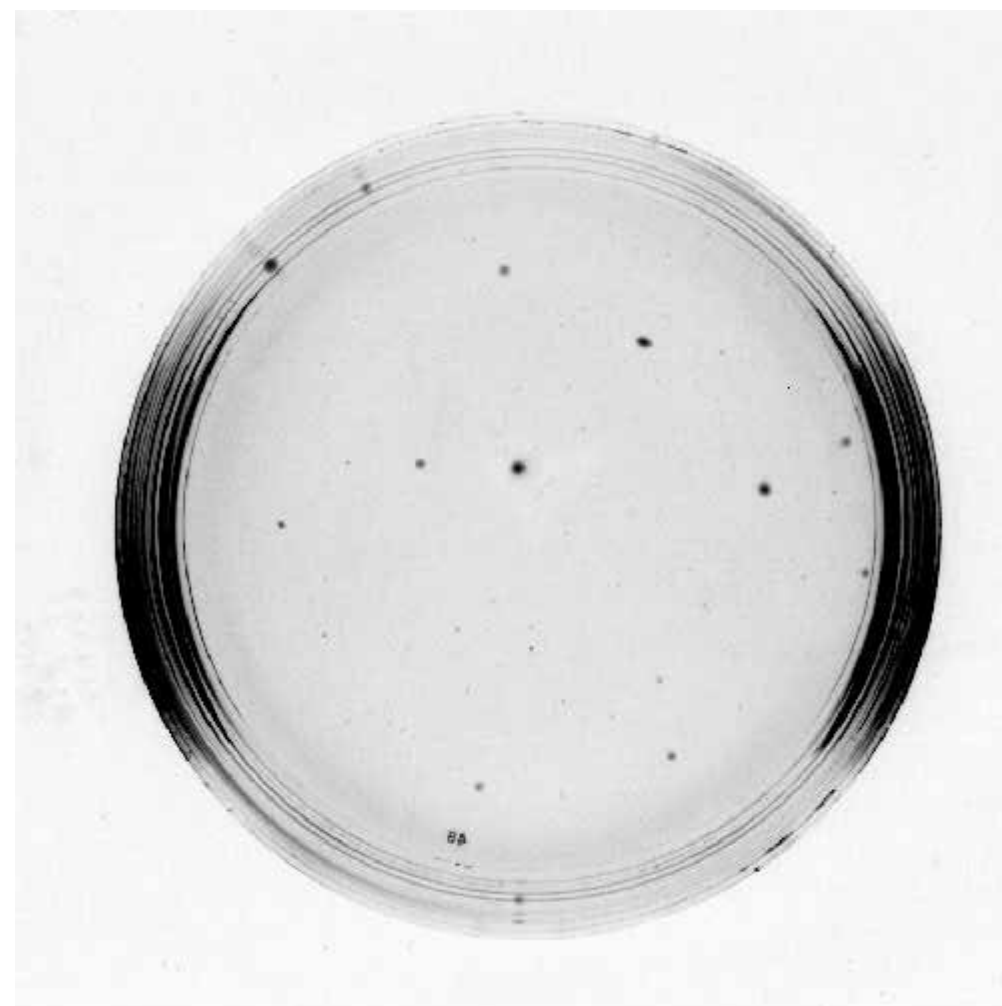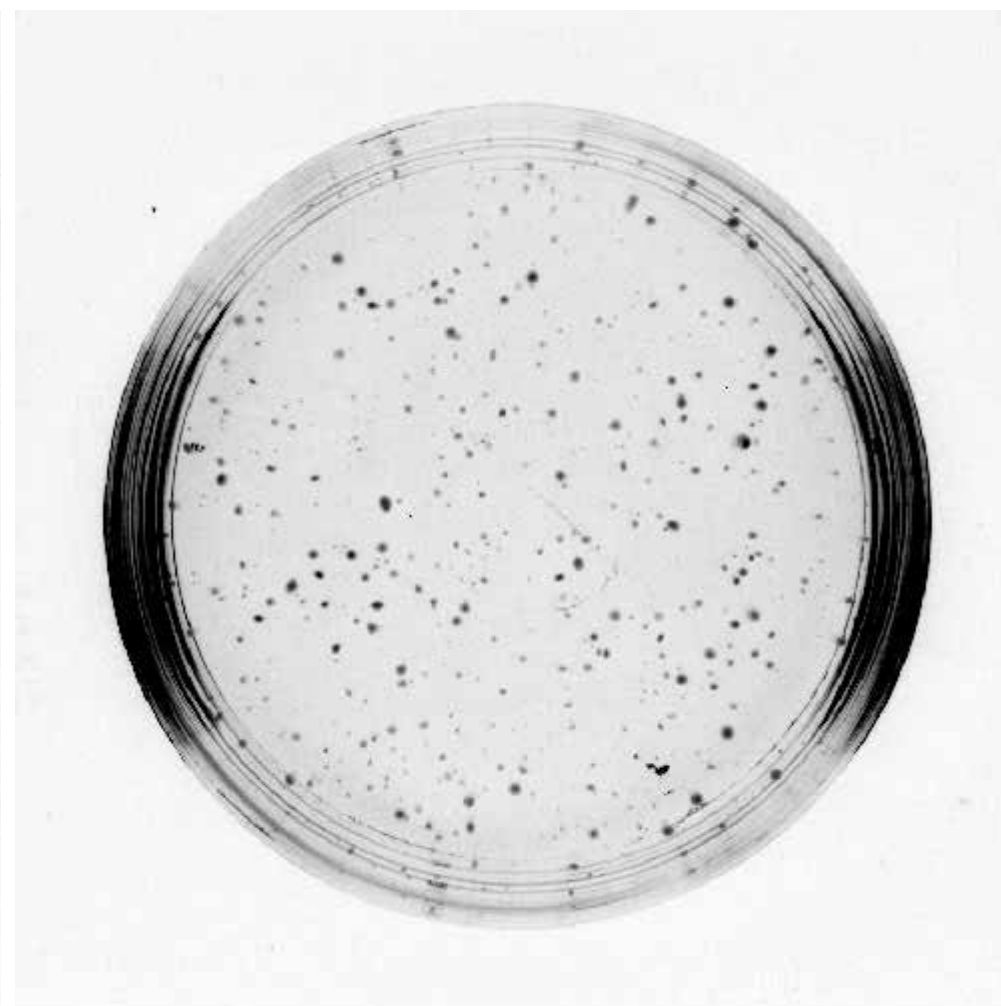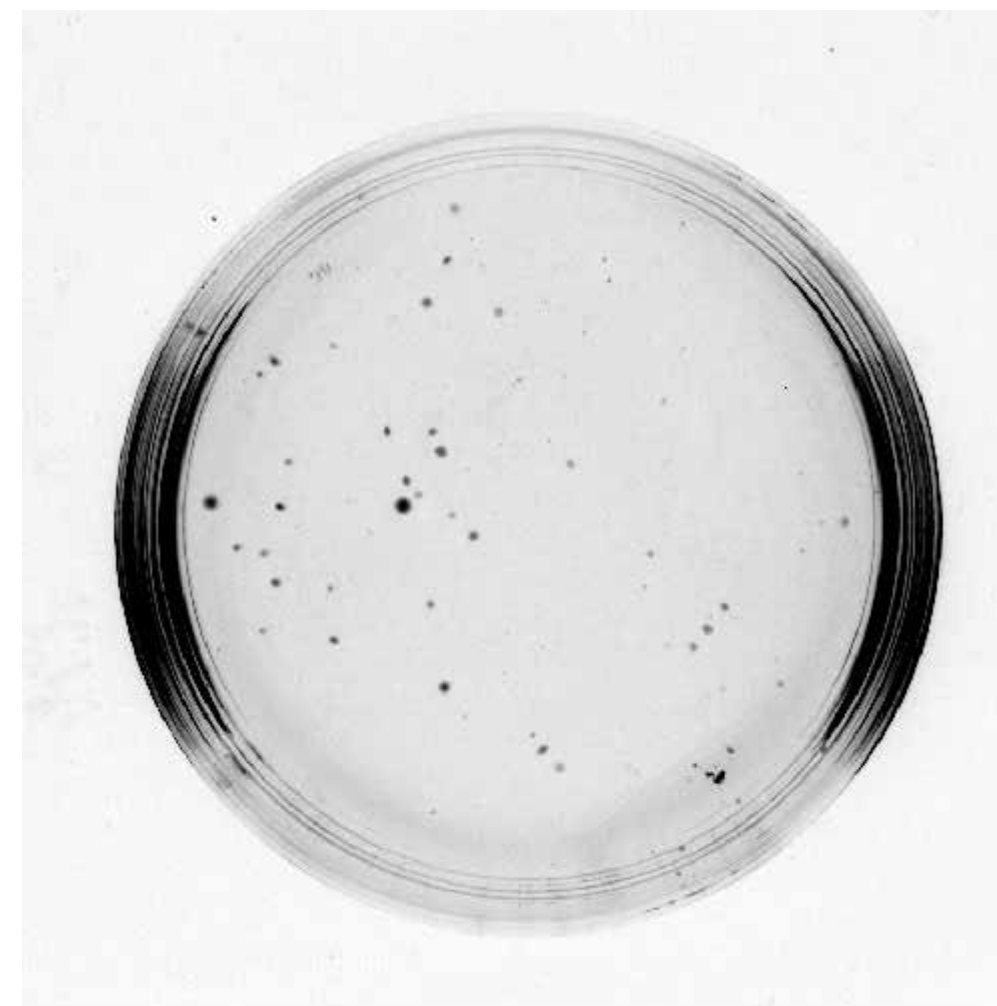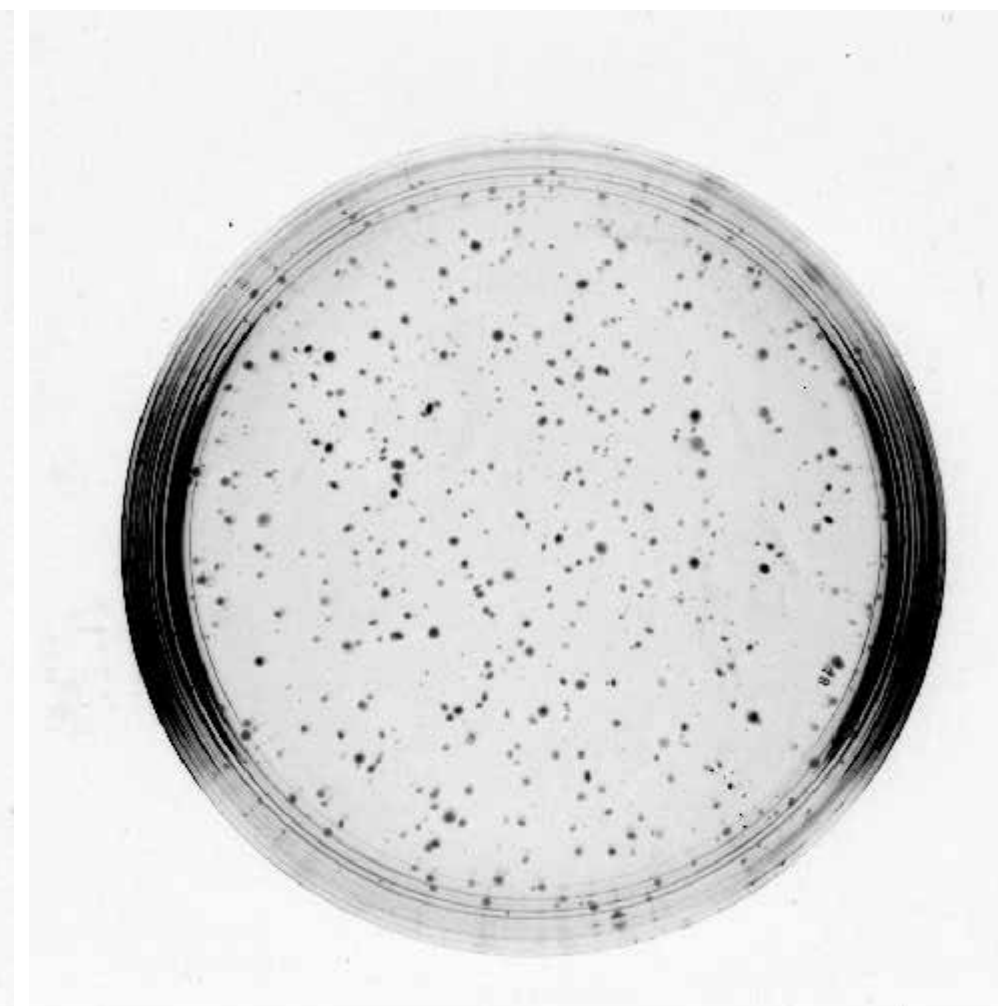

Tech rep 2

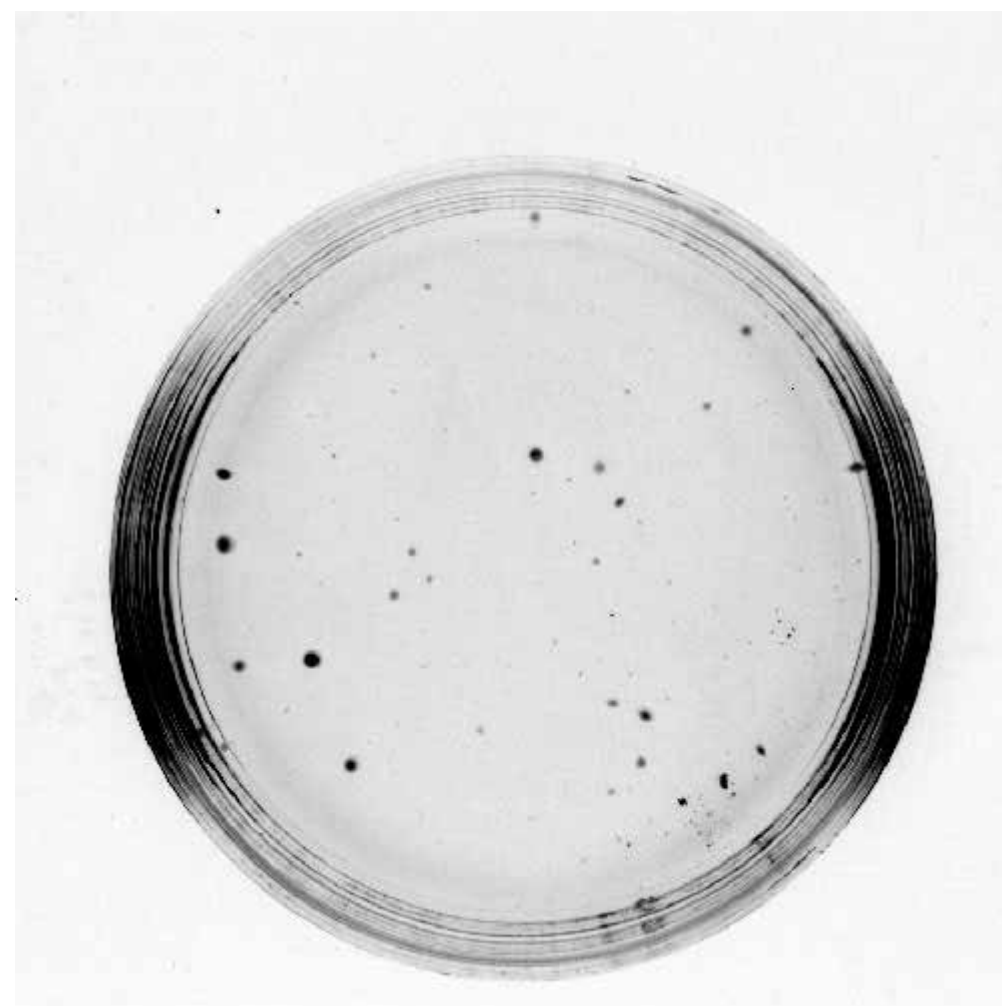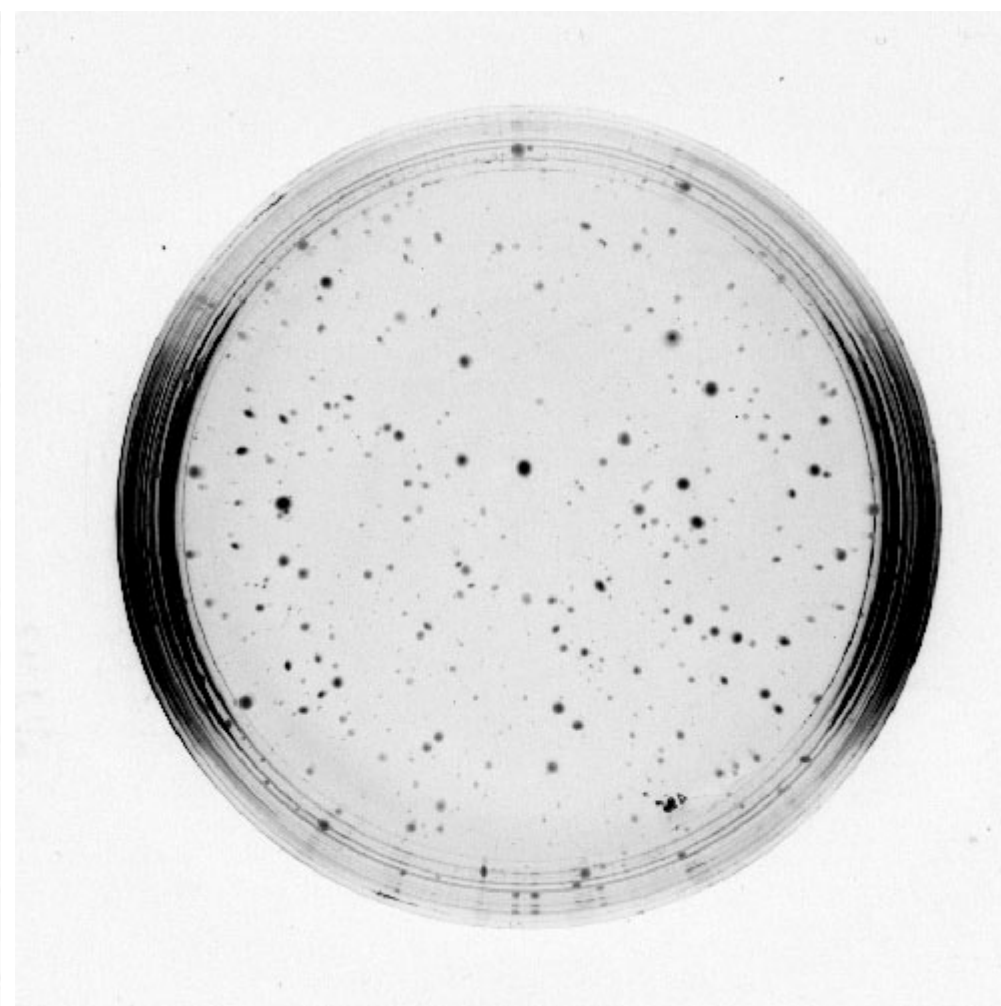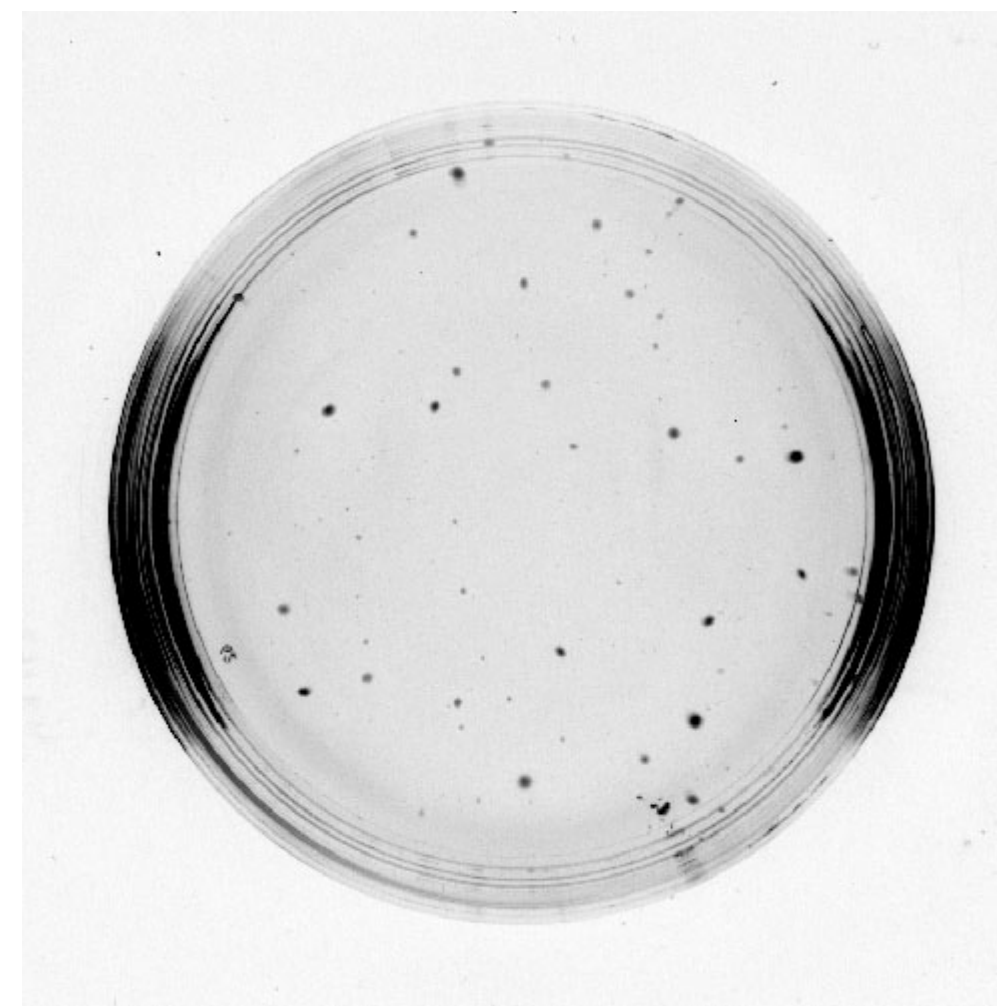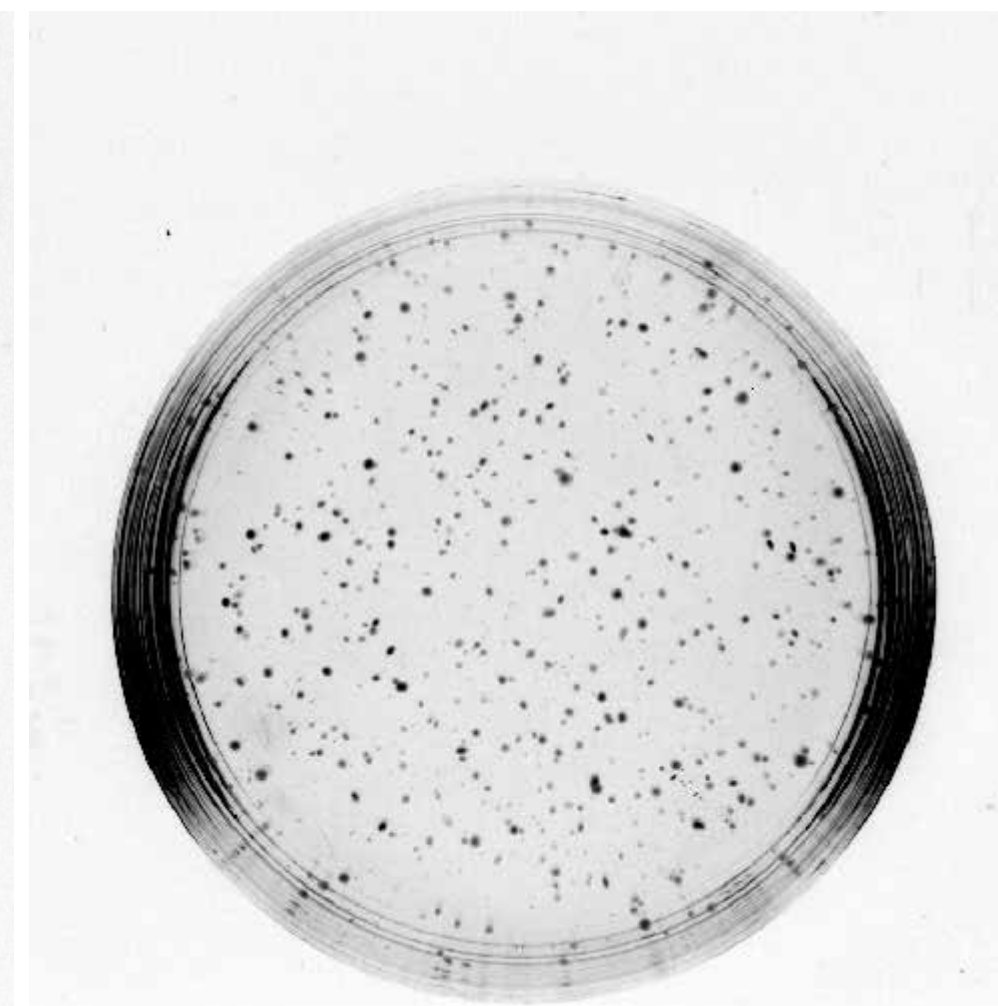

A673 Rep 2

Supplement: fig1-figsupp1-data3 [file R2_submission.pdf › Labelled images/R2_submission.pdf]

iEF/197

iEF/wtEF

iEF/DBD

iEF/DBD+

Tech rep 1

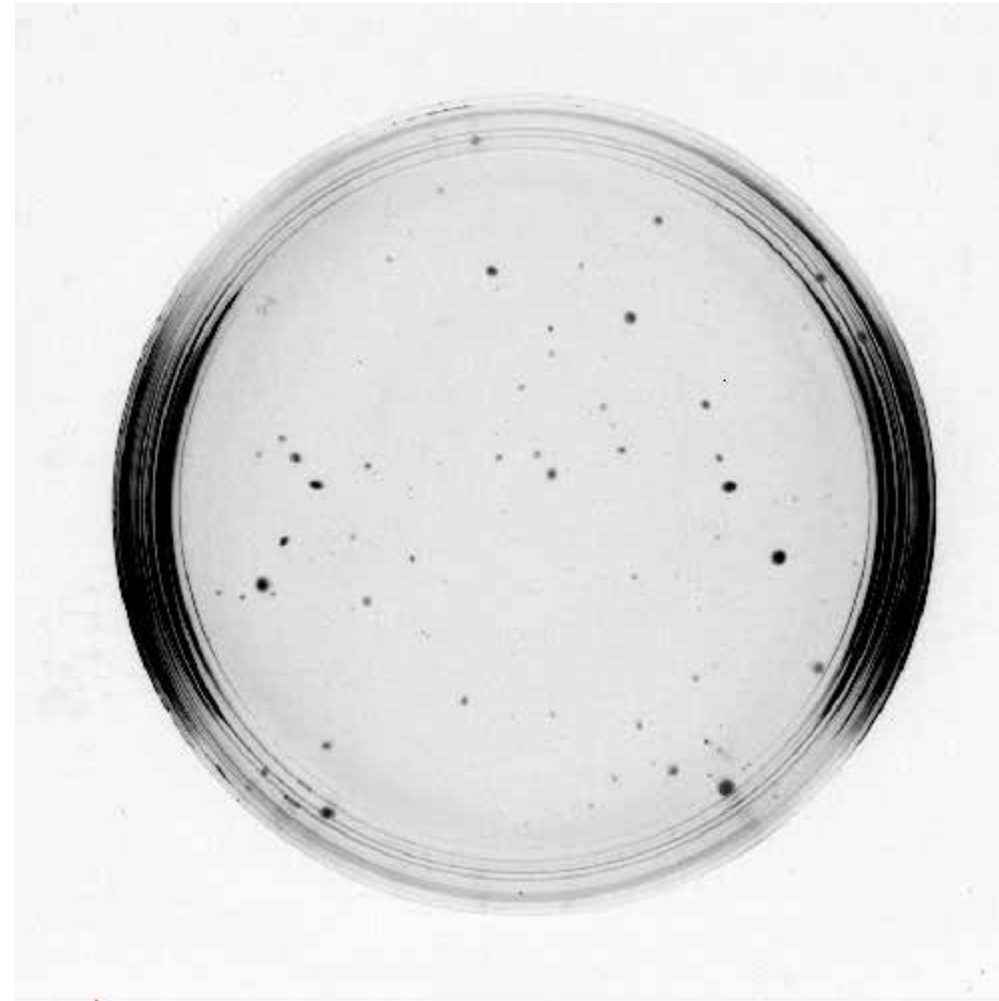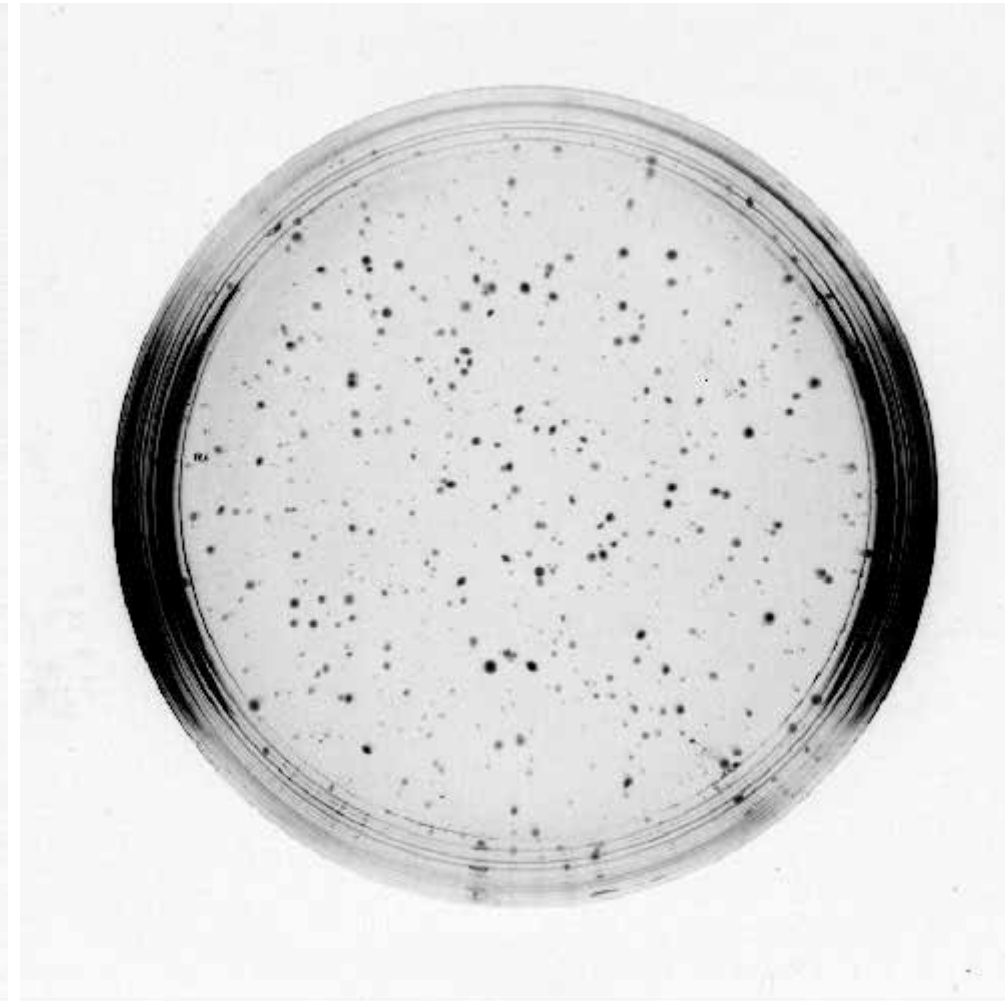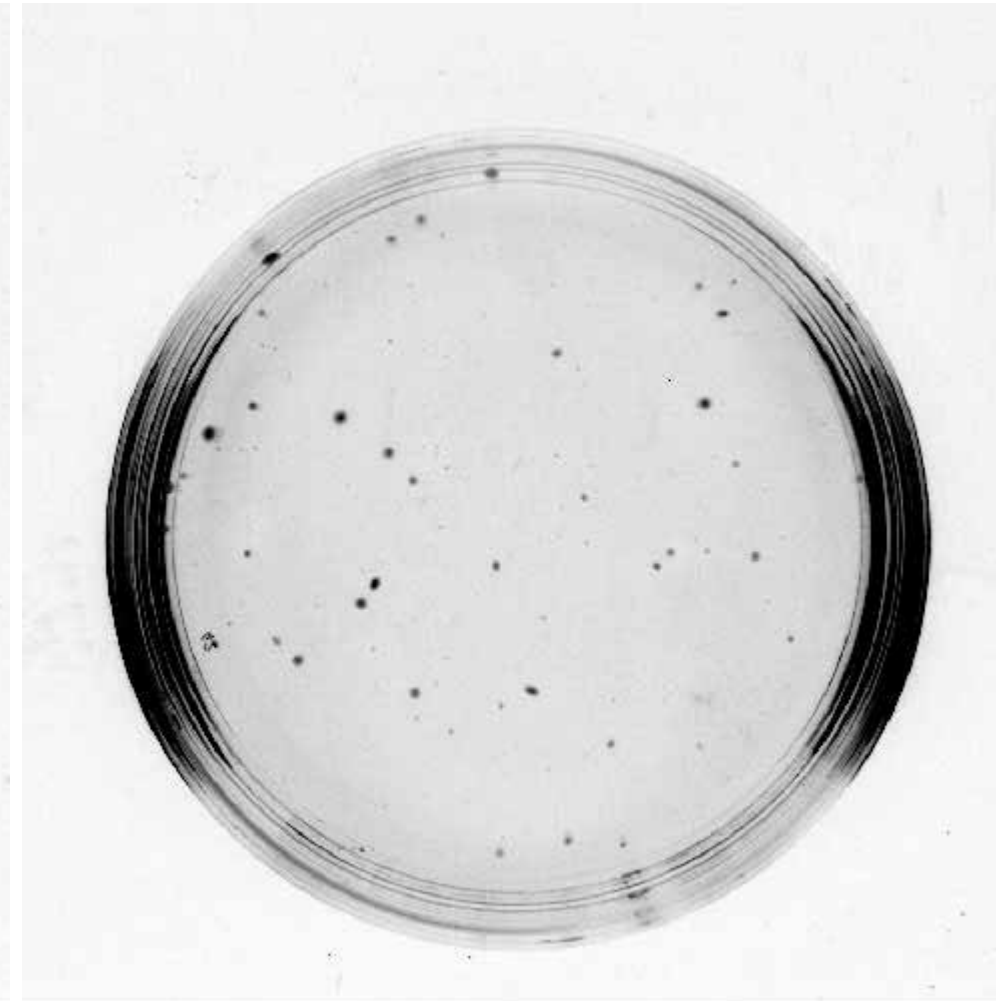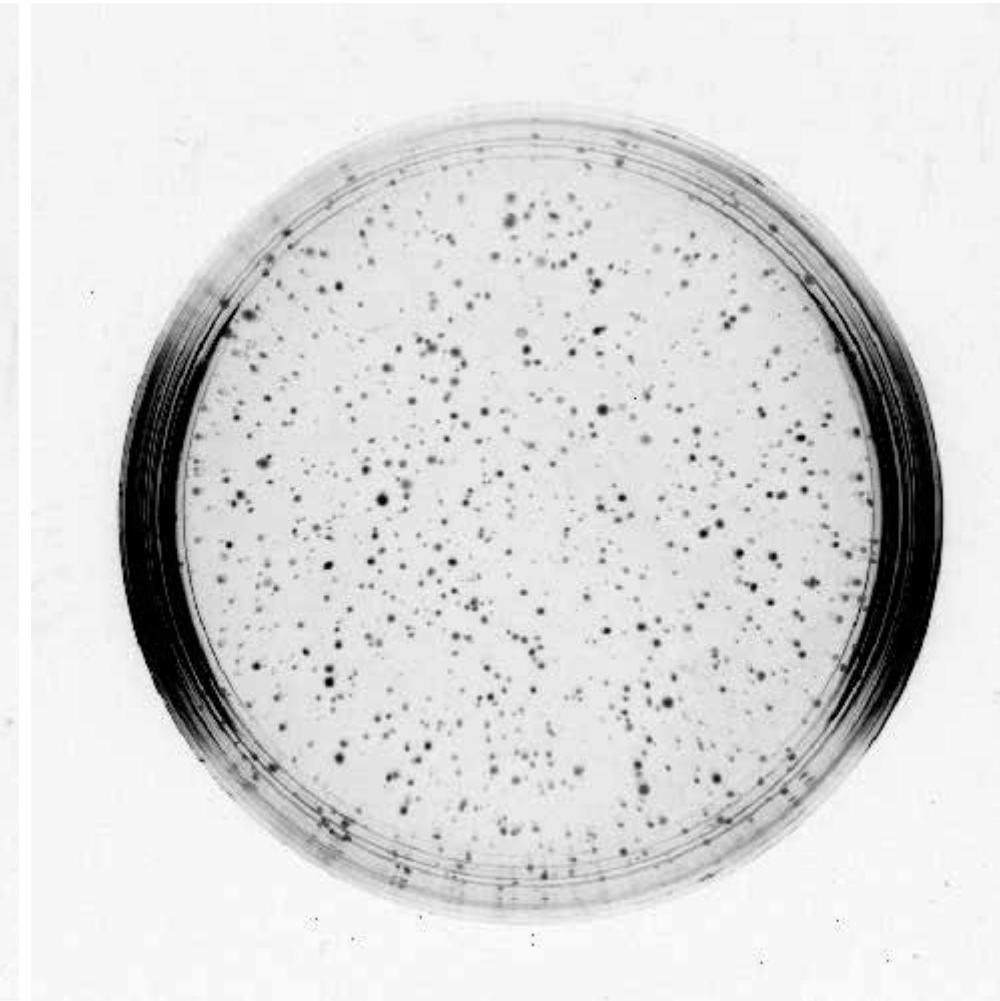

Tech rep 2

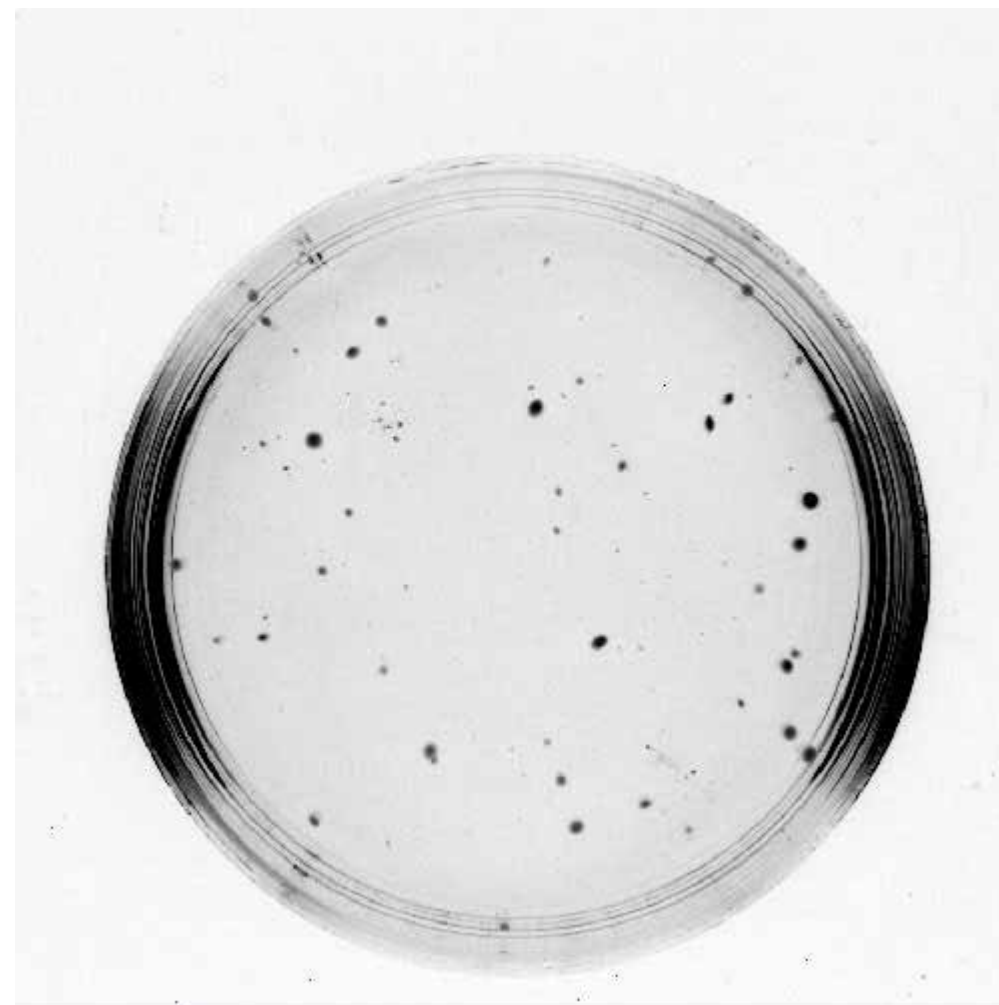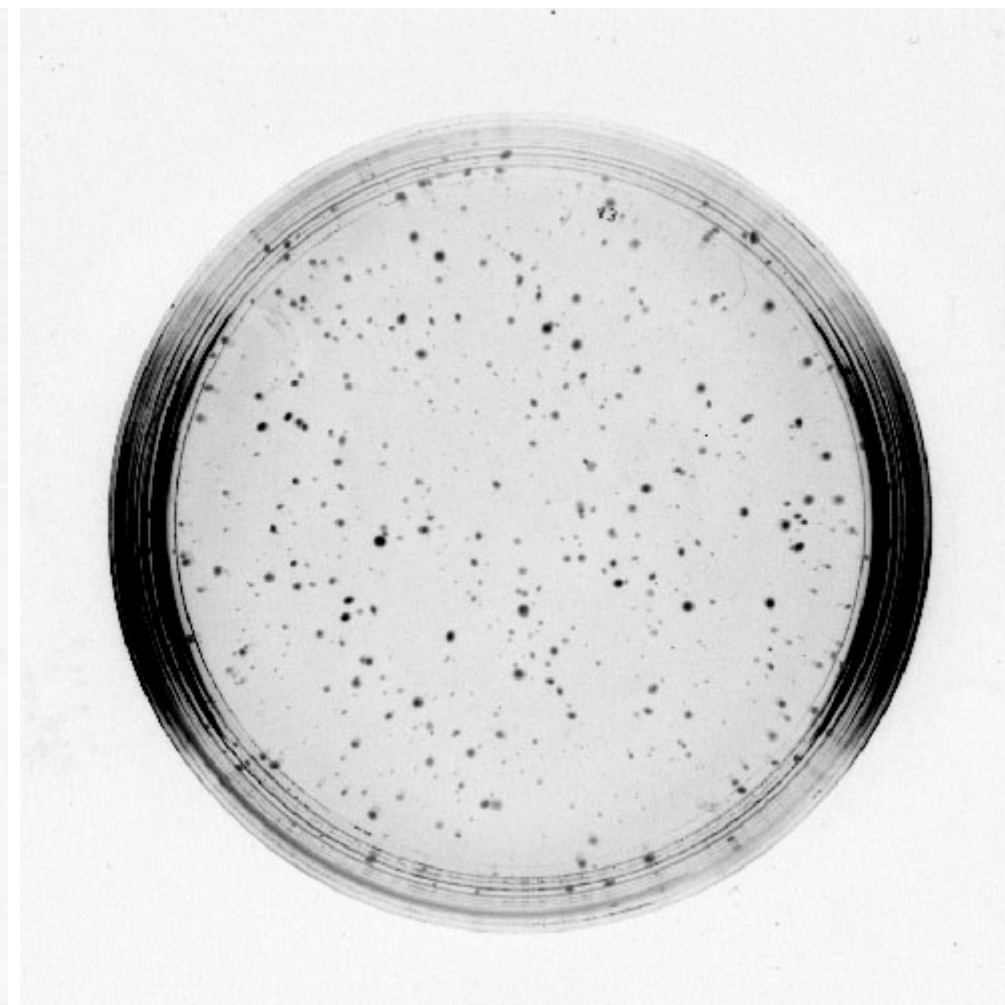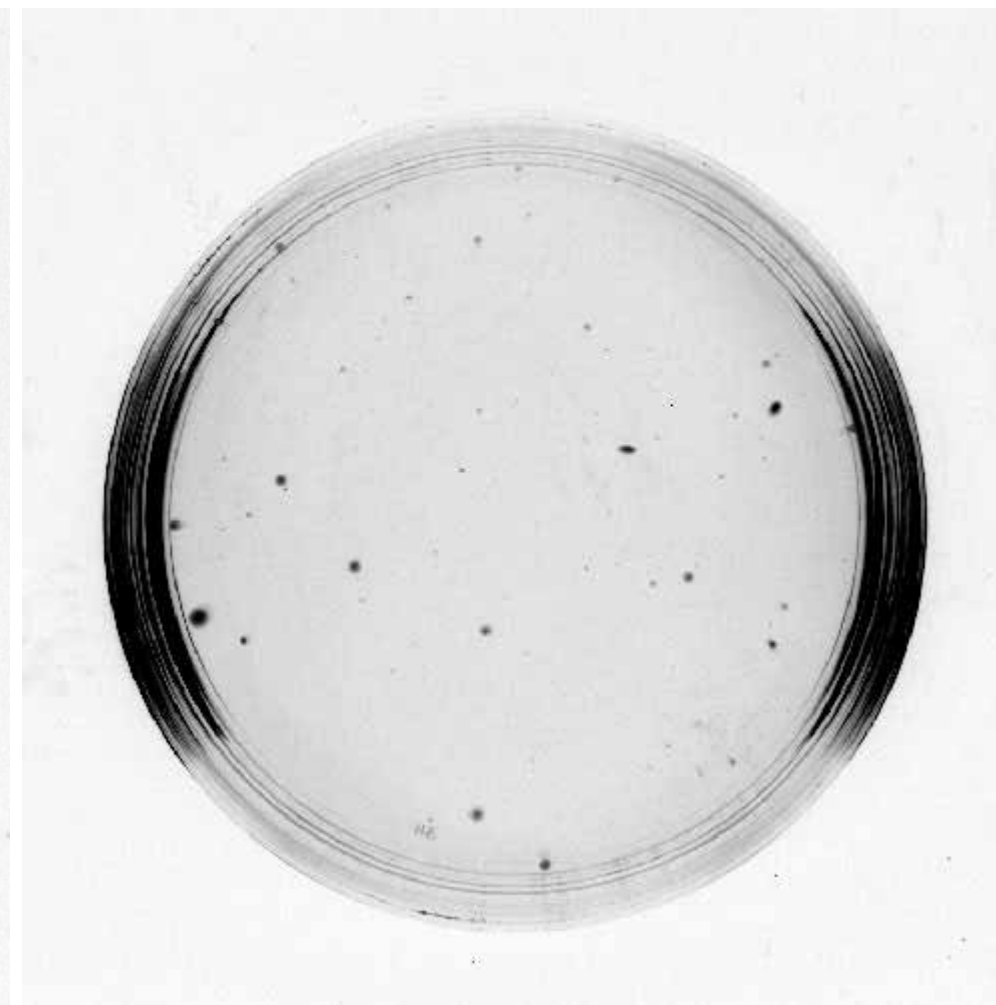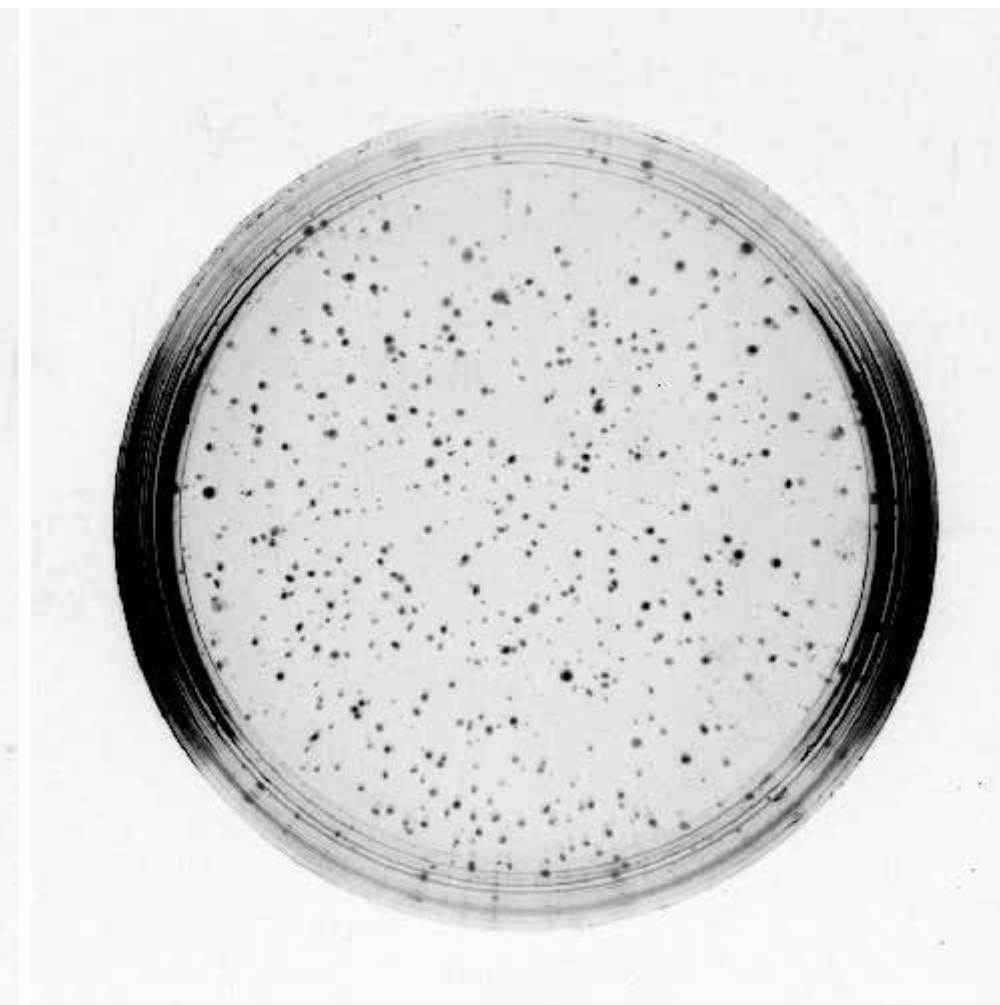

A673 Rep 3

Supplement: fig1-figsupp1-data3 [file R3_submission.pdf › Labelled images/R3_submission.pdf]

ERG

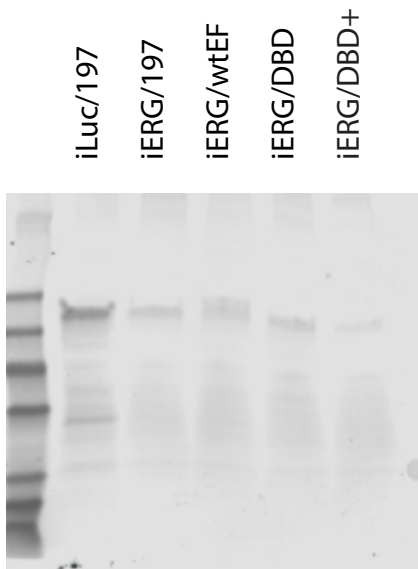

FLAG

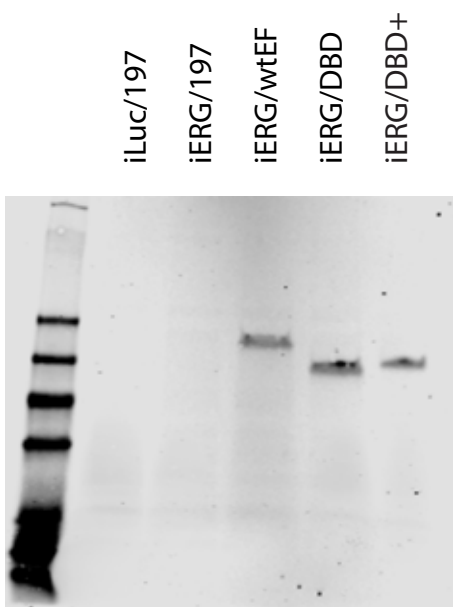

Tubulin

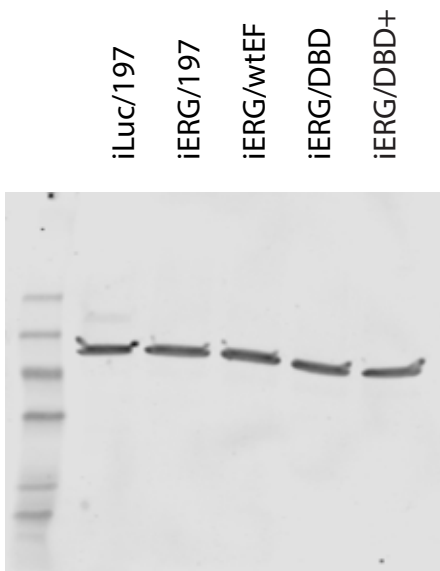

Supplement: fig1-figsupp3-data1 [file TTC446_uncropped.pdf › Labelled images/TTC446_uncropped.pdf]

iERG/197

iERG/wtEF

iERG/DBD

iERG/DBD+

Tech rep 1

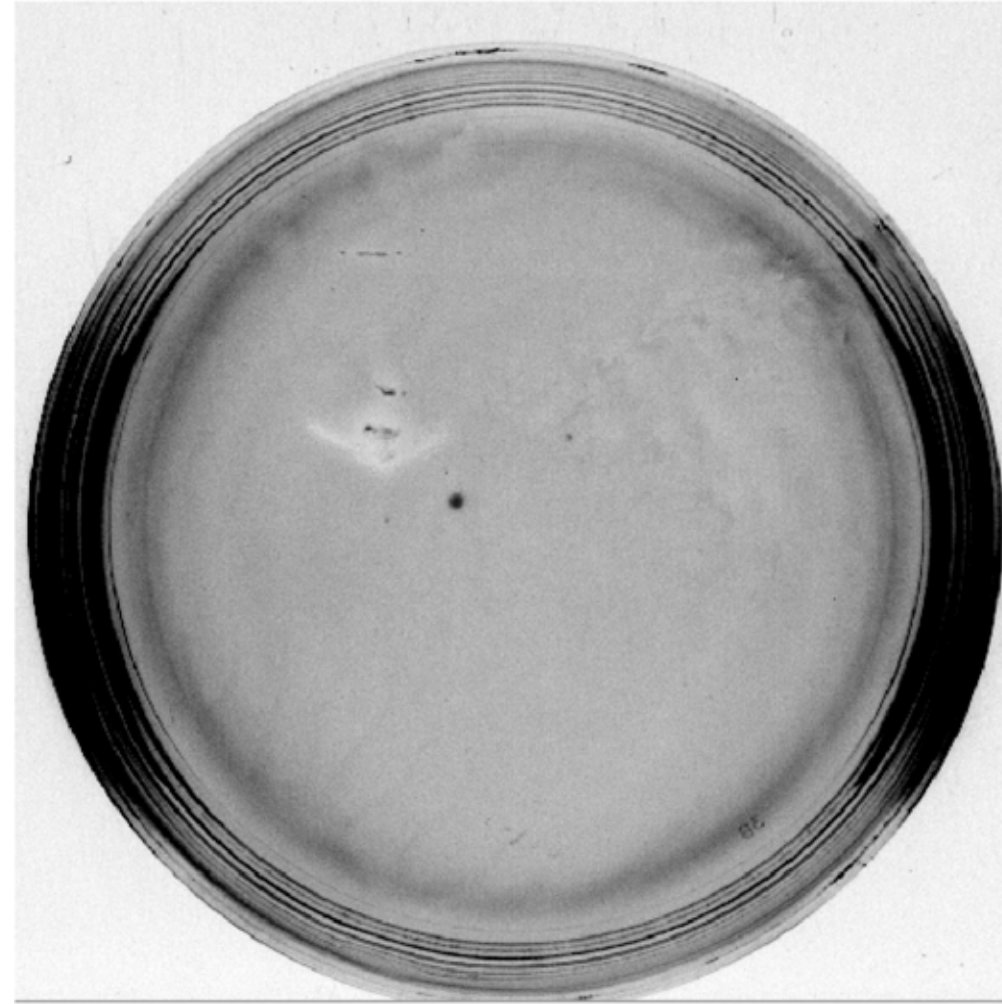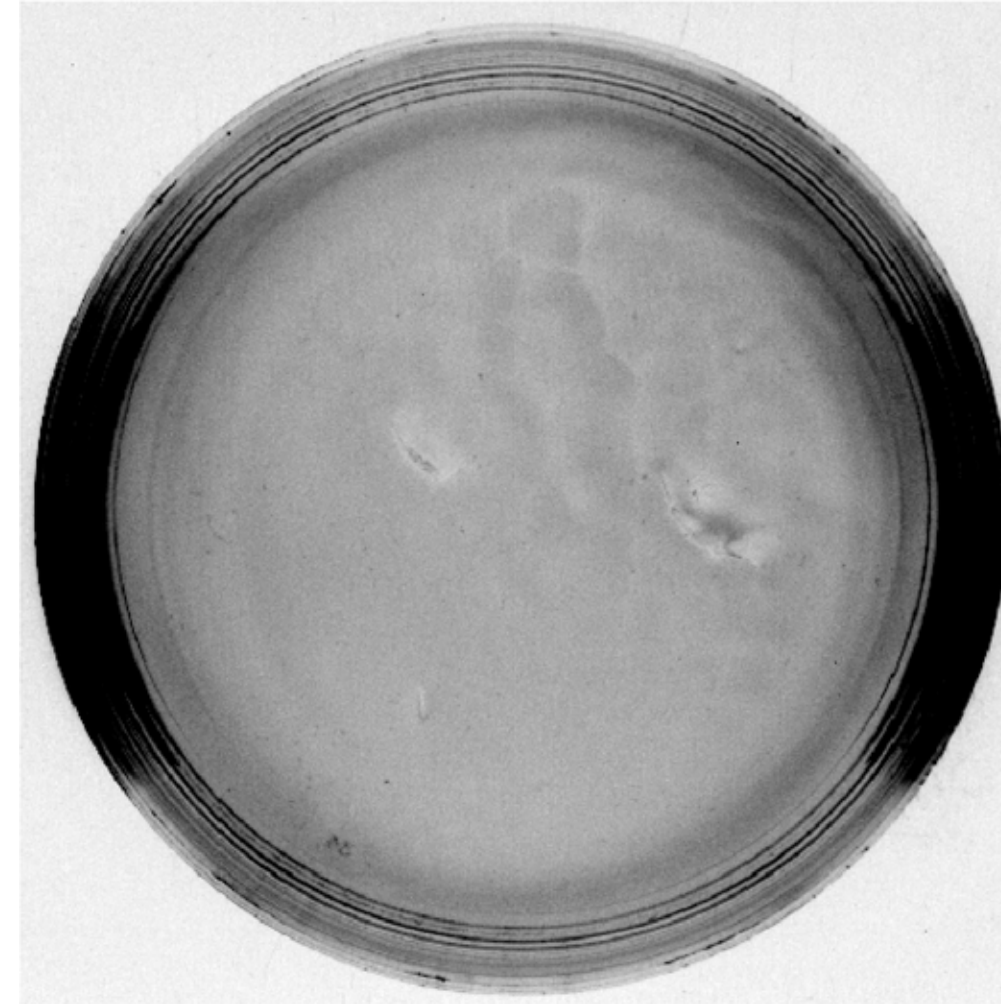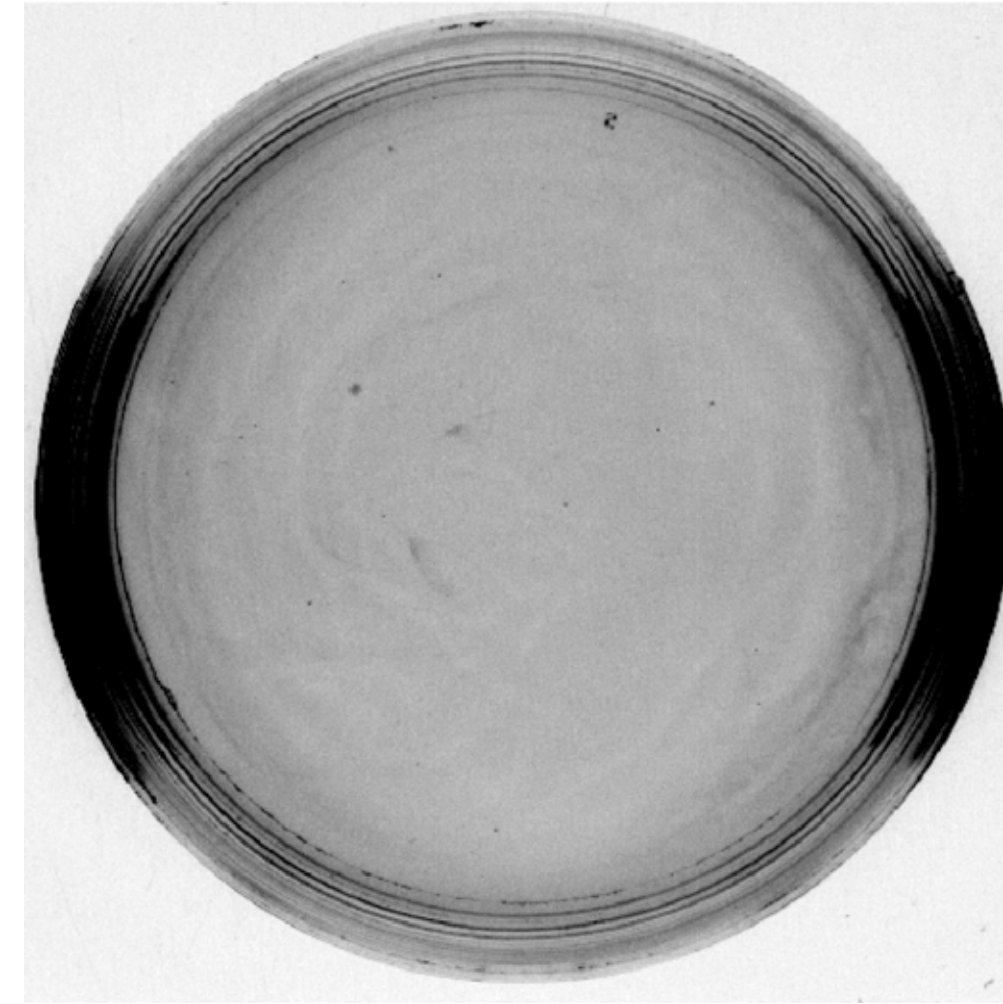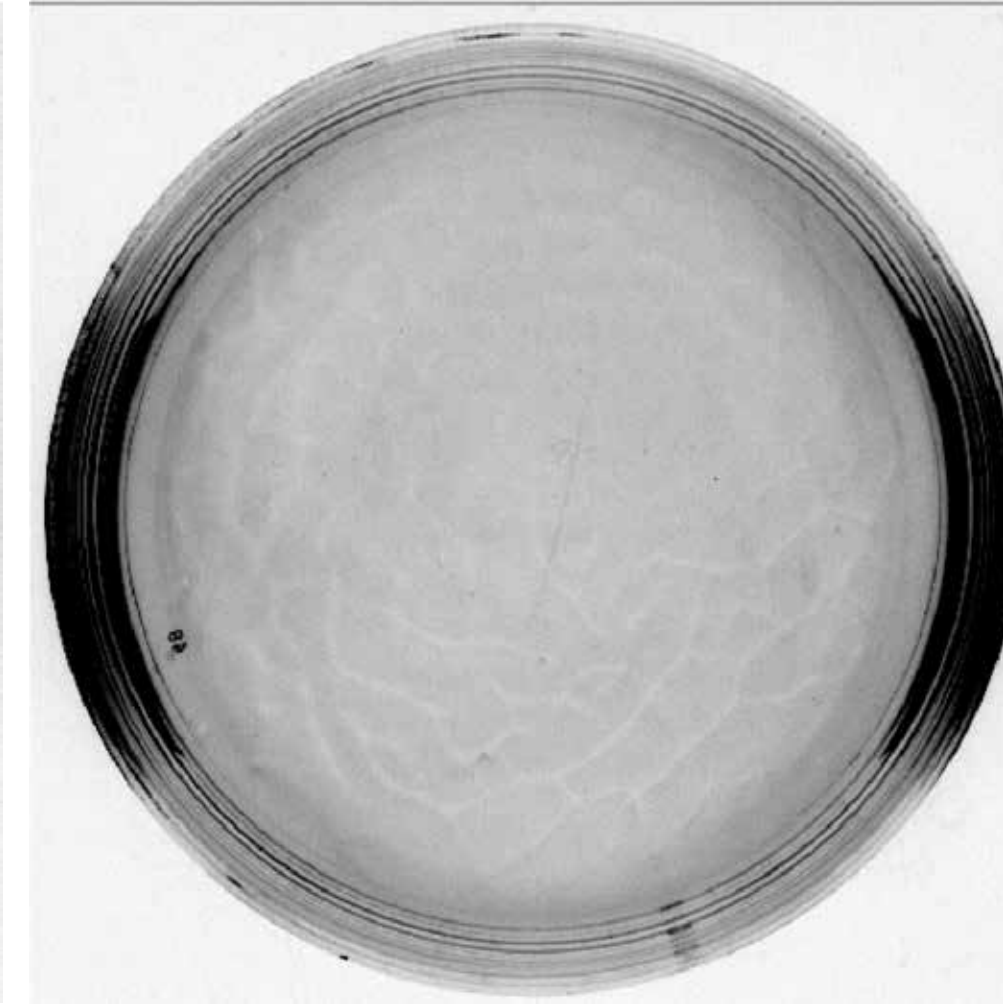

Tech rep 2

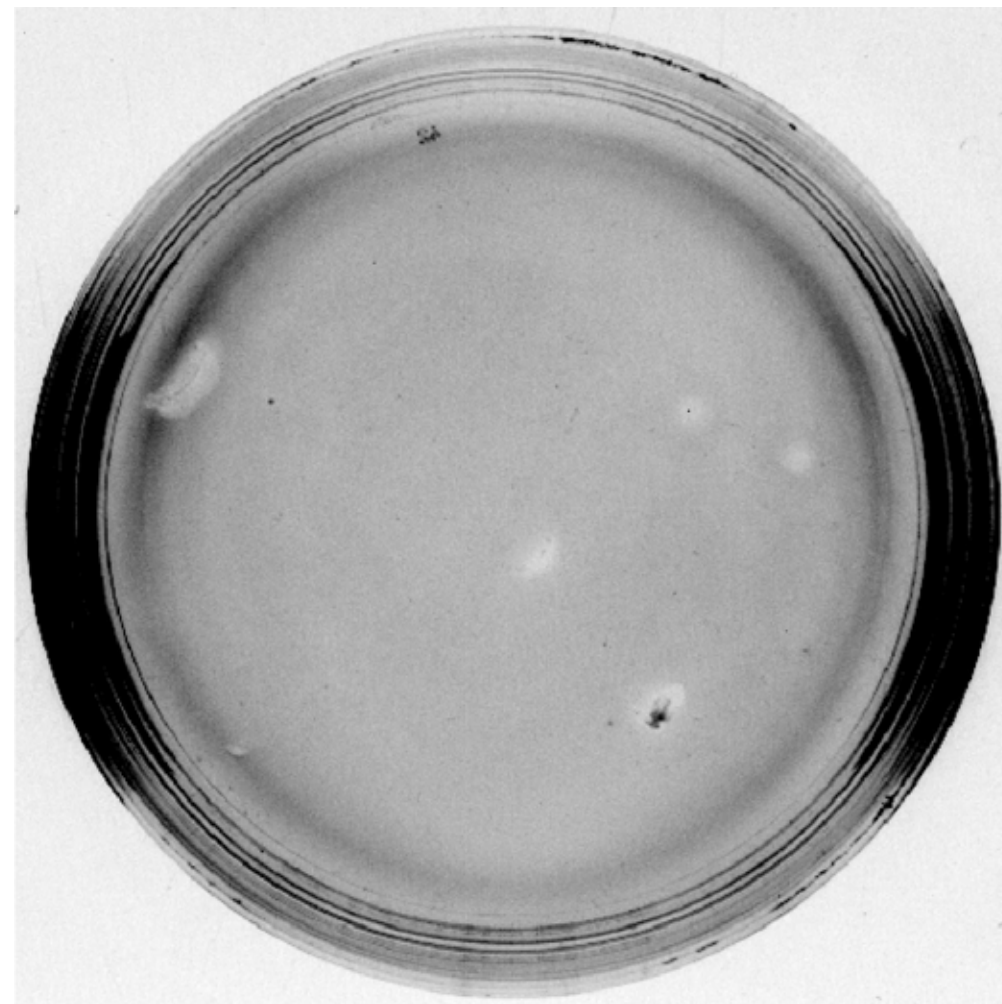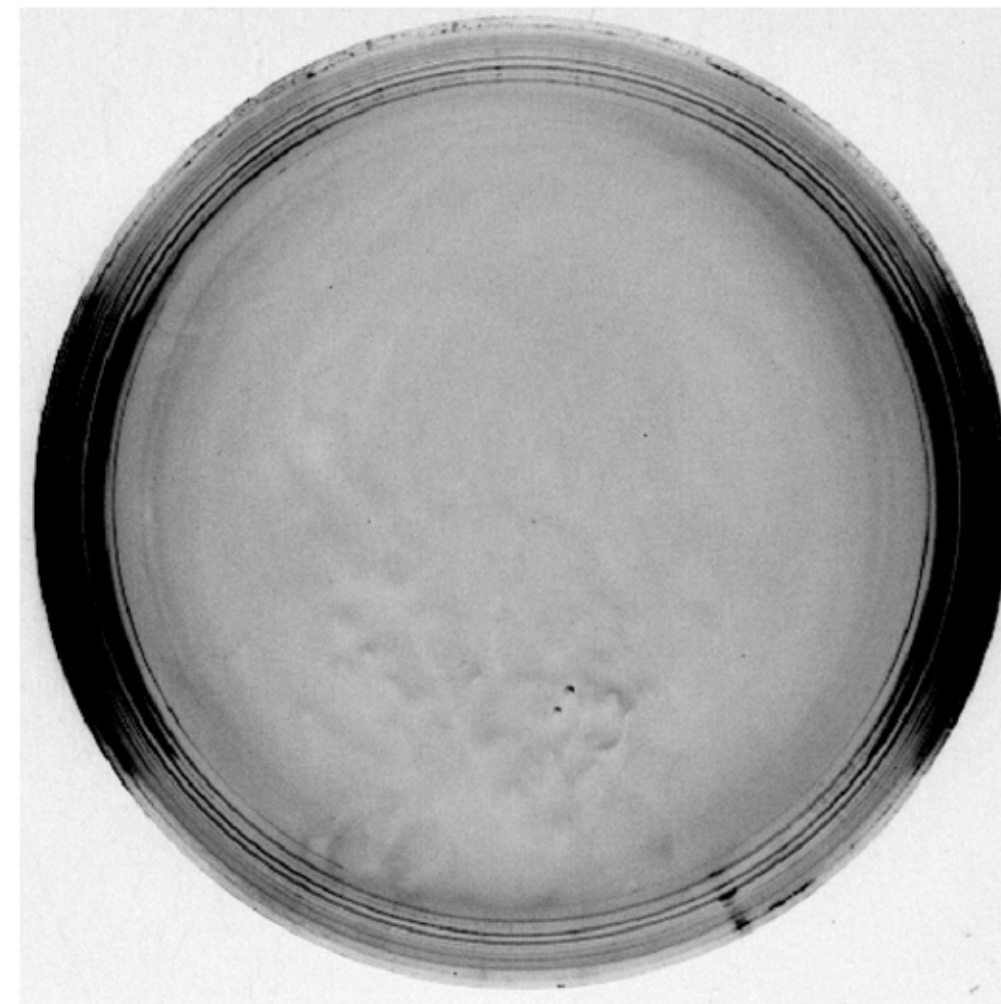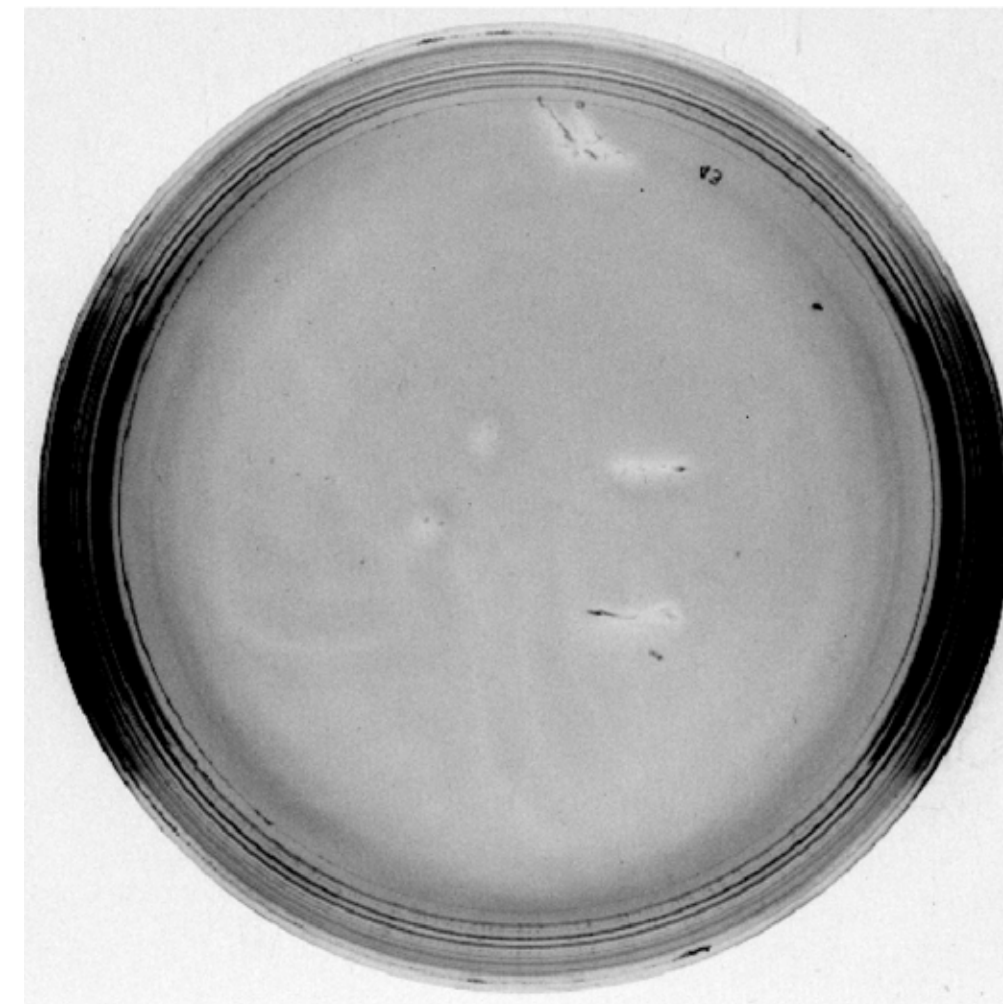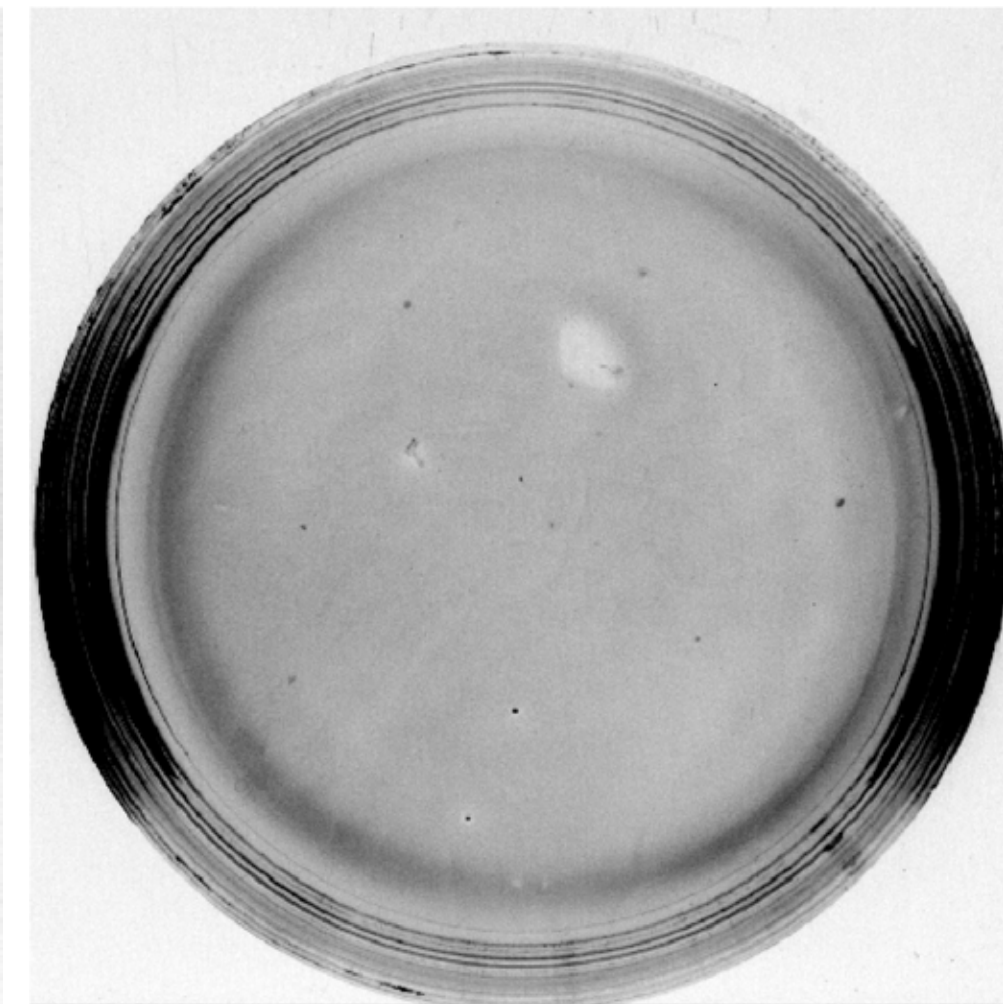

TTC466 Rep 2

Supplement: fig1-figsupp3-data3 [file R2_submission.pdf › Labelled images/R2_submission.pdf]

iERG/197

iERG/wtEF

iERG/DBD

iERG/DBD+

Tech rep 1

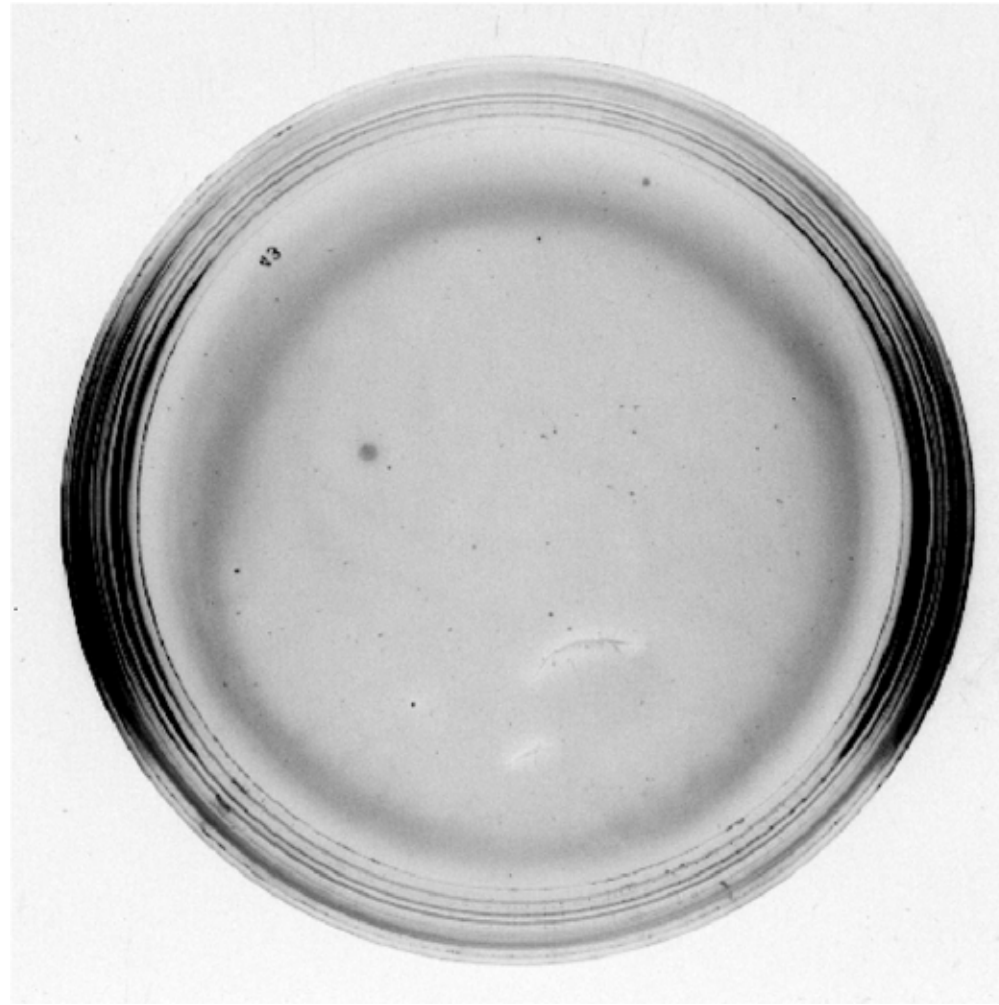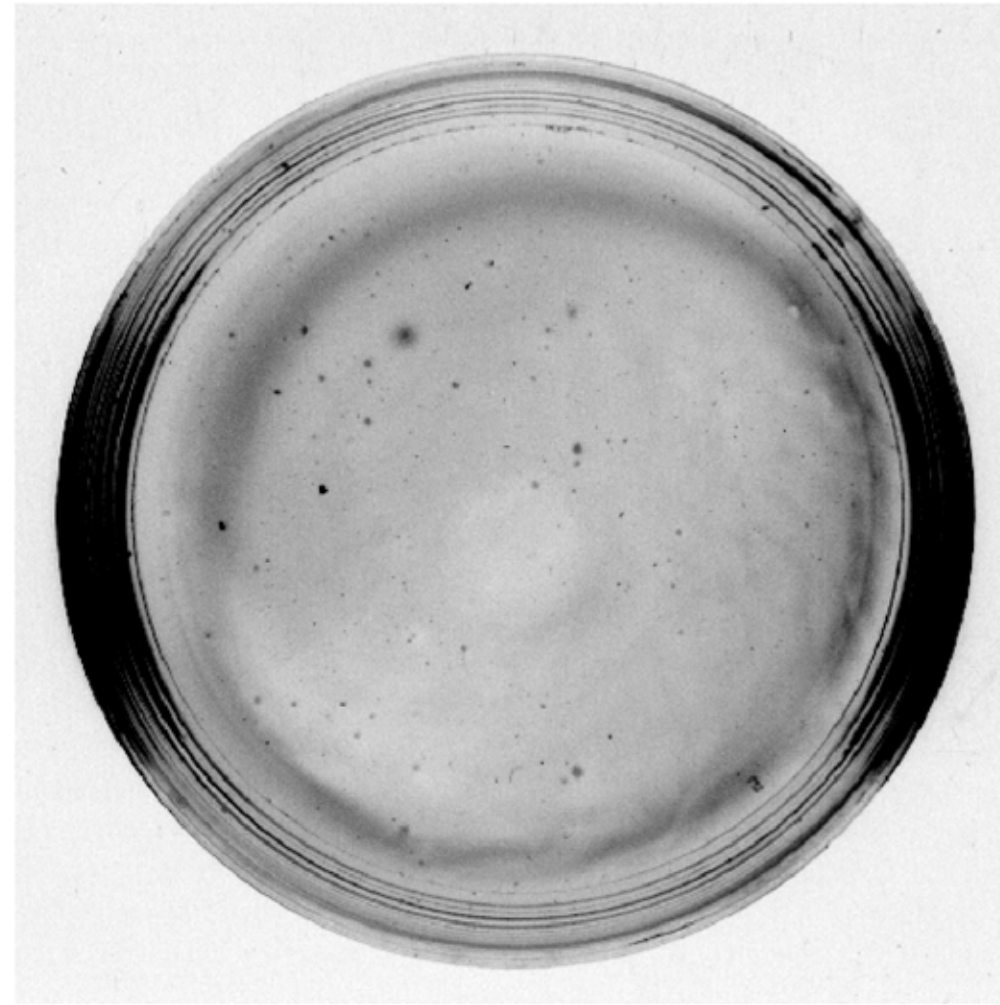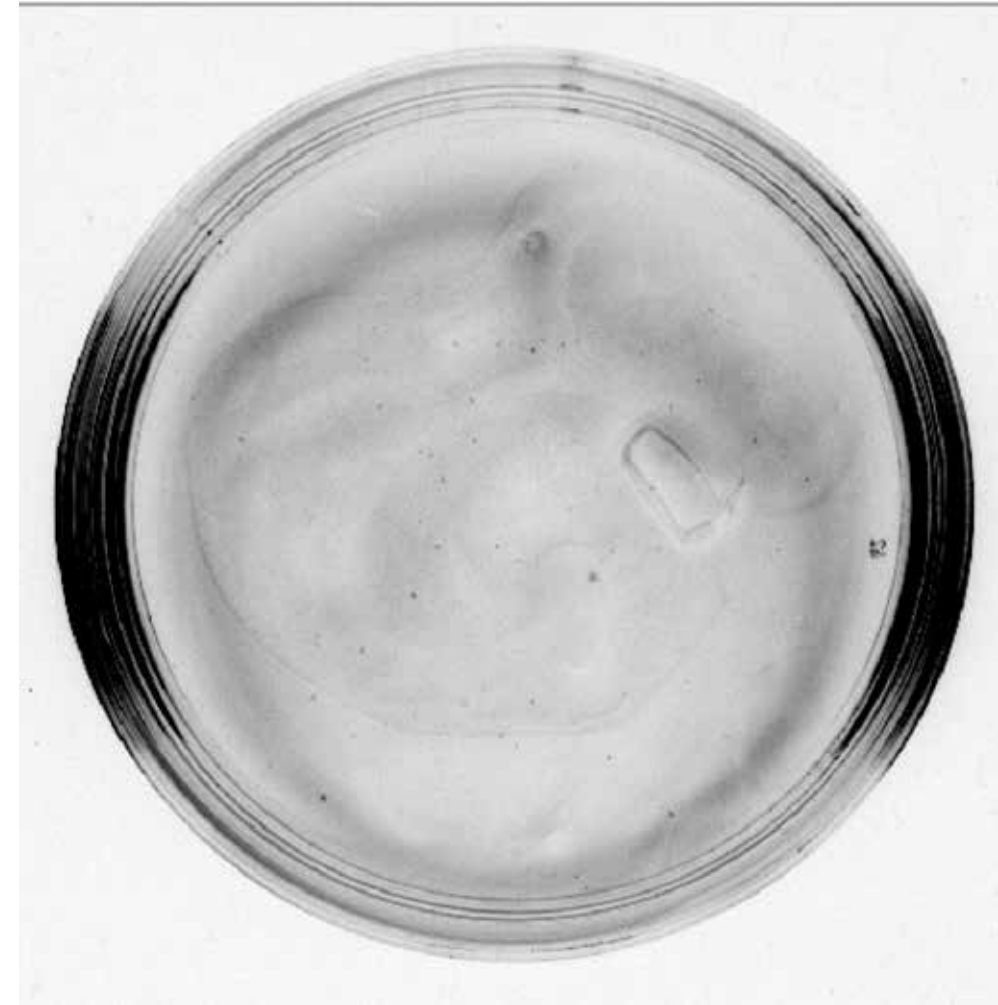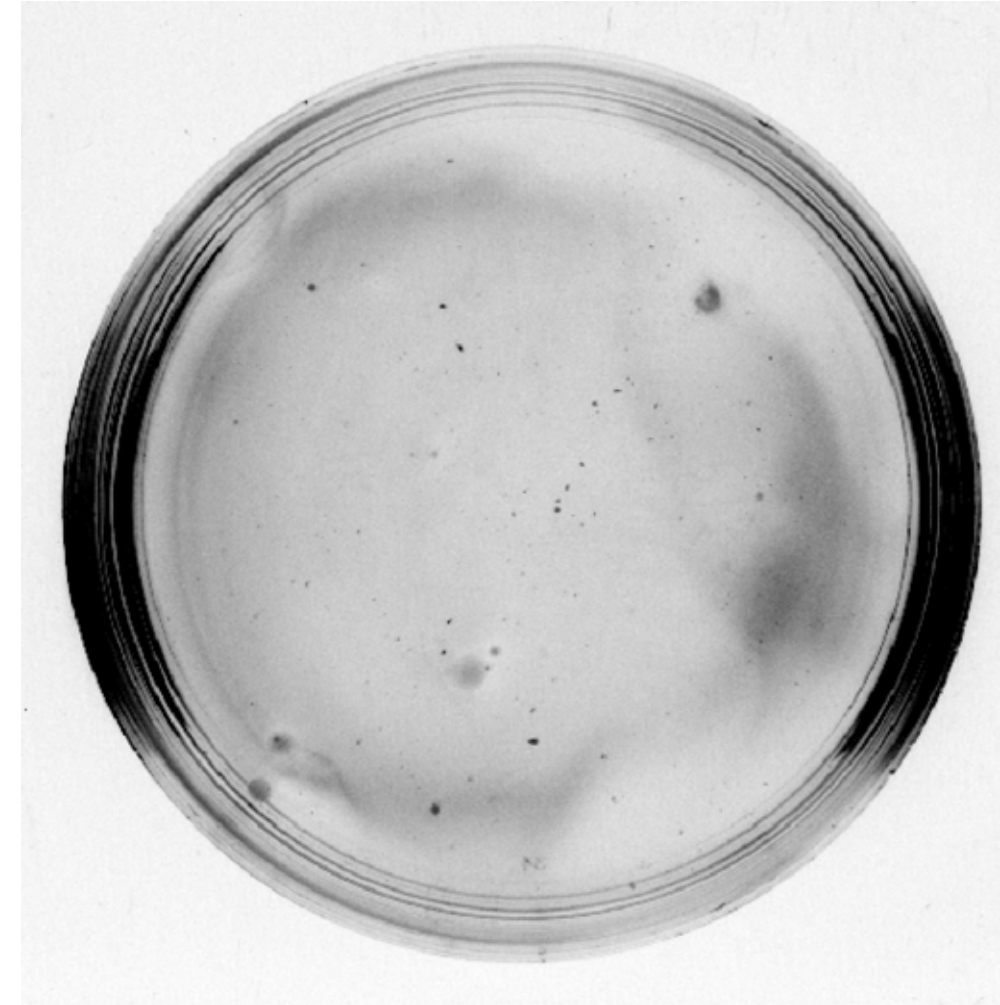

Tech rep 2

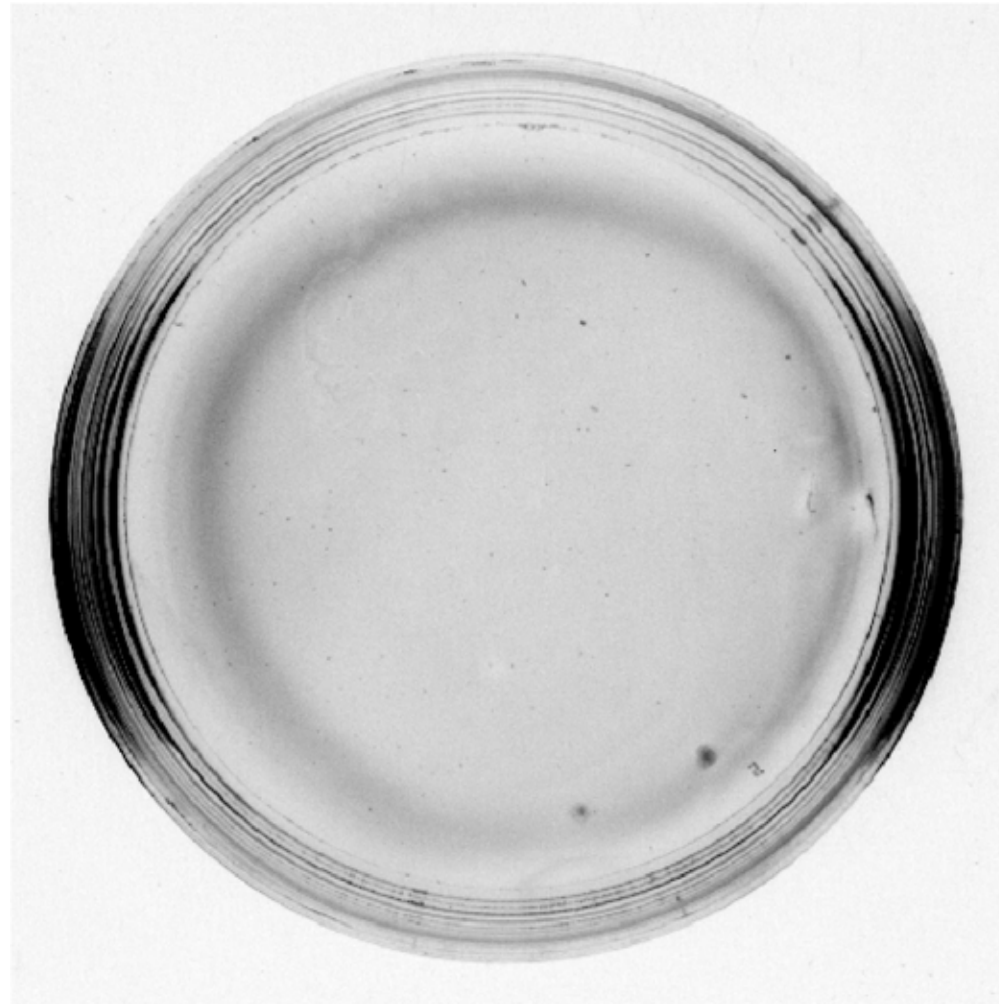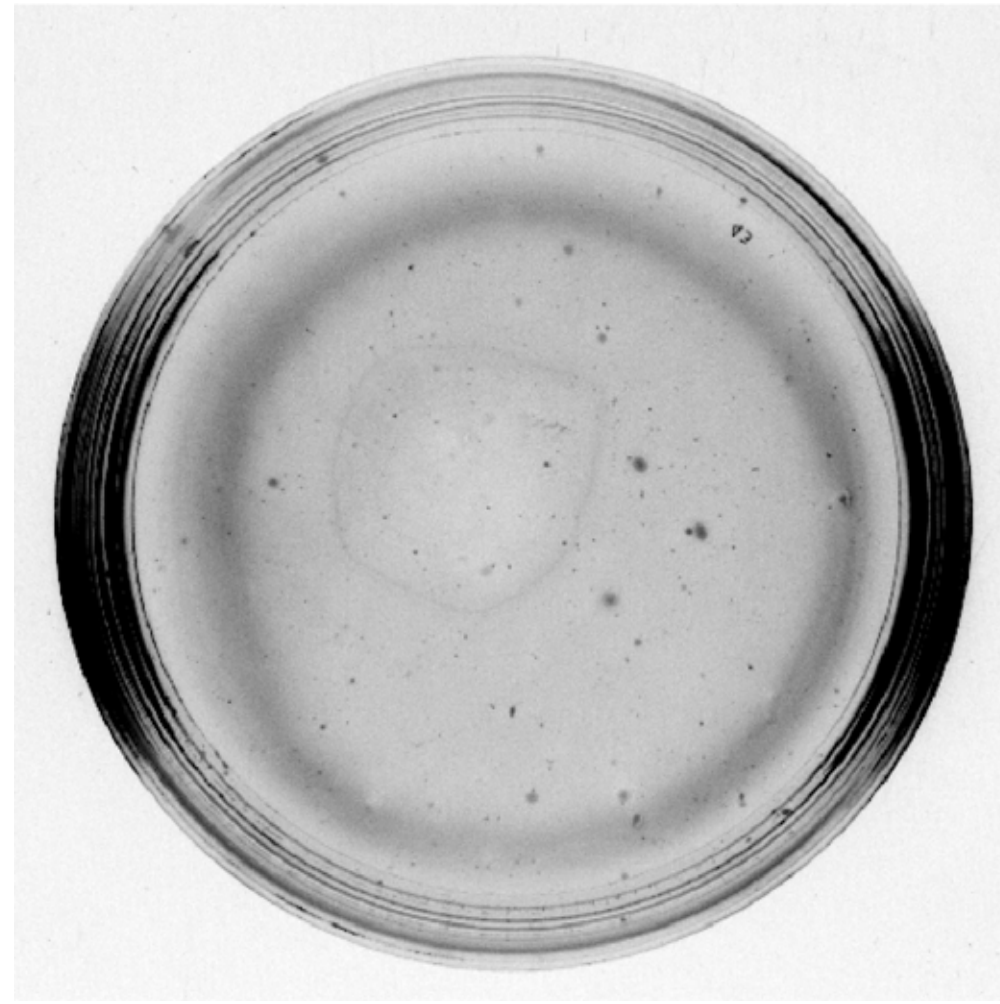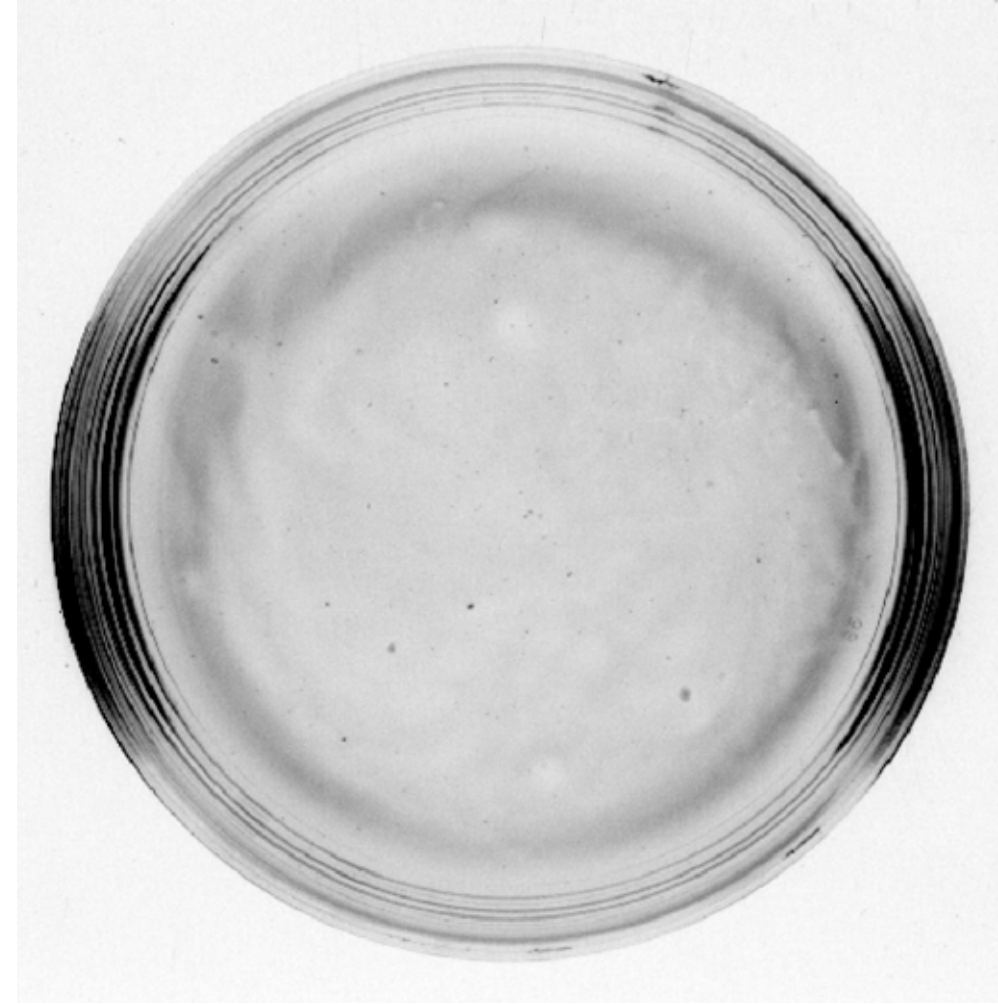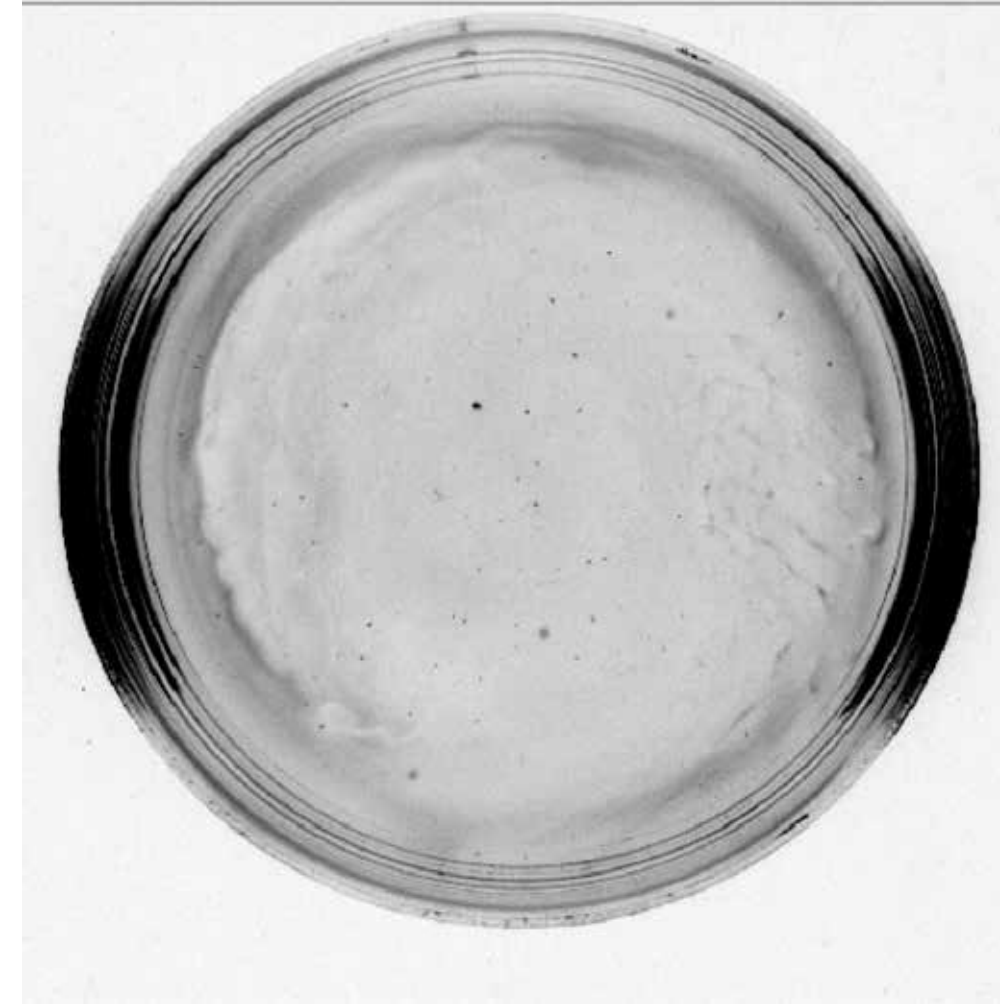

TTC466 Rep 3

Supplement: fig1-figsupp3-data3 [file R3_submission.pdf › Labelled images/R3_submission.pdf]
